# Supplementary material for: Prevalence of comorbidities and their associated factors in patients with type 2 diabetes at a tertiary care department in Ningbo, China: a cross-sectional study
Source: PubMed Central journal article supplement — BMJ Open. 2021 Jan 7;11(1):e040532. doi: 10.1136/bmjopen-2020-040532 (PMC7797259; doi:10.1136/bmjopen-2020-040532), 2021-01-07
Supplement: bmjopen-2020-040532.draft_revisions.pdf [file bmjopen-2020-040532.draft_revisions.pdf]

# BMJ Open

BMJ Open is committed to open peer review. As part of this commitment we make the peer review history of every article we publish publicly available.

When an article is published we post the peer reviewers' comments and the authors' responses online. We also post the versions of the paper that were used during peer review. These are the versions that the peer review comments apply to.

The versions of the paper that follow are the versions that were submitted during the peer review process. They are not the versions of record or the final published versions. They should not be cited or distributed as the published version of this manuscript.

BMJ Open is an open access journal and the full, final, typeset and author-corrected version of record of the manuscript is available on our site with no access controls, subscription charges or pay-per-view fees (<http://bmjopen.bmj.com>).

If you have any questions on BMJ Open's open peer review process please email [info.bmjopen@bmj.com](mailto:info.bmjopen@bmj.com)

# BMJ Open

## A retrospective database study to explore multimorbidity among patients with type 2 diabetes in a tertiary care department in Ningbo, China

|                               |                                                                                                                                                                                                                                                                                                                                                                                                                                                                                                                                                                                                                                                                                                  |
|-------------------------------|--------------------------------------------------------------------------------------------------------------------------------------------------------------------------------------------------------------------------------------------------------------------------------------------------------------------------------------------------------------------------------------------------------------------------------------------------------------------------------------------------------------------------------------------------------------------------------------------------------------------------------------------------------------------------------------------------|
| Journal:                      | <i>BMJ Open</i>                                                                                                                                                                                                                                                                                                                                                                                                                                                                                                                                                                                                                                                                                  |
| Manuscript ID                 | bmjopen-2020-040532                                                                                                                                                                                                                                                                                                                                                                                                                                                                                                                                                                                                                                                                              |
| Article Type:                 | Original research                                                                                                                                                                                                                                                                                                                                                                                                                                                                                                                                                                                                                                                                                |
| Date Submitted by the Author: | 15-May-2020                                                                                                                                                                                                                                                                                                                                                                                                                                                                                                                                                                                                                                                                                      |
| Complete List of Authors:     | Li, Xueyu; Ningbo City First Hospital, Department of Endocrinology and Metabolism; Ningbo University Medical School<br>Chattopadhyay, Kaushik; University of Nottingham School of Health Sciences, ; London School of Hygiene and Tropical Medicine,<br>Xu, Shengnan; Ningbo City First Hospital, Department of Endocrinology and Metabolism<br>Chen, Yanshu; Ningbo City First Hospital, Department of Endocrinology and Metabolism<br>Xu, Miao; Ningbo City First Hospital, Department of Endocrinology and Metabolism<br>li, li; Ningbo City First Hospital, Department of Endocrinology and Metabolism<br>Li, Jialin; Ningbo City First Hospital, Department of Endocrinology and Metabolism |
| Keywords:                     | General diabetes < DIABETES & ENDOCRINOLOGY, PUBLIC HEALTH, HEALTH SERVICES ADMINISTRATION & MANAGEMENT                                                                                                                                                                                                                                                                                                                                                                                                                                                                                                                                                                                          |
|                               |                                                                                                                                                                                                                                                                                                                                                                                                                                                                                                                                                                                                                                                                                                  |

SCHOLARONE™  
Manuscripts

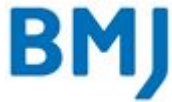

I, the Submitting Author has the right to grant and does grant on behalf of all authors of the Work (as defined in the below author licence), an exclusive licence and/or a non-exclusive licence for contributions from authors who are: i) UK Crown employees; ii) where BMJ has agreed a CC-BY licence shall apply, and/or iii) in accordance with the terms applicable for US Federal Government officers or employees acting as part of their official duties; on a worldwide, perpetual, irrevocable, royalty-free basis to BMJ Publishing Group Ltd ("BMJ") its licensees and where the relevant Journal is co-owned by BMJ to the co-owners of the Journal, to publish the Work in this journal and any other BMJ products and to exploit all rights, as set out in our [licence](#).

The Submitting Author accepts and understands that any supply made under these terms is made by BMJ to the Submitting Author unless you are acting as an employee on behalf of your employer or a postgraduate student of an affiliated institution which is paying any applicable article publishing charge ("APC") for Open Access articles. Where the Submitting Author wishes to make the Work available on an Open Access basis (and intends to pay the relevant APC), the terms of reuse of such Open Access shall be governed by a Creative Commons licence – details of these licences and which [Creative Commons](#) licence will apply to this Work are set out in our licence referred to above.

Other than as permitted in any relevant BMJ Author's Self Archiving Policies, I confirm this Work has not been accepted for publication elsewhere, is not being considered for publication elsewhere and does not duplicate material already published. I confirm all authors consent to publication of this Work and authorise the granting of this licence.

**Title**

A retrospective database study to explore multimorbidity among patients with type 2 diabetes in a tertiary care department in Ningbo, China

Xueyu Li\*<sup>1, 2</sup>, Kaushik Chattopadhyay\*<sup>3</sup>, Shengnan Xu<sup>1</sup>, Yanshu Chen<sup>1</sup>, Miao Xu<sup>1</sup>, Li Li<sup>1</sup>, Jialin Li<sup>1</sup>

<sup>1</sup>Department of Endocrinology and Metabolism, Ningbo First Hospital, Ningbo, PR China

<sup>2</sup>Ningbo University Medical School, Ningbo, PR China

<sup>3</sup>Division of Epidemiology and Public Health, School of Medicine, University of Nottingham, Nottingham, UK

\*These authors contributed equally to this work.

Corresponding author: Dr Jialin Li, e-mail; [lijialin@sina.com](mailto:lijialin@sina.com)

## Abstract

**Objectives** To determine the prevalence of multimorbidity among type 2 diabetes (T2DM) patients and factors independently associated with multimorbidity in a tertiary care department in Ningbo, China.

**Design** A computerised medical records database was used to conduct a retrospective cross-sectional study.

**Setting** Tertiary care department in Ningbo, China.

**Participants** The study included adult patients with T2DM and eight years of data, from 1 January 2012 to 31 December 2019.

**Primary outcome measure** Multimorbidity which was defined as having T2DM and at least one other chronic condition, each one was either a physical non-communicable disease of long duration ( $\geq 3$  months), a mental health condition of long duration ( $\geq 3$  months) or an infectious disease of long duration ( $\geq 3$  months).

**Results** 4777 patients satisfied the eligibility criteria. Over eight years, the prevalence of multimorbidity among patients with T2DM was 93.7%. Those who had multimorbidity, the mean ( $\pm$ standard deviation) number of other chronic conditions was 3 ( $\pm 1$ ). The odds of multimorbidity increased with the age of patients (18-39 years: 1; 40-59 years: odds ratio 2.80, 95% confidence interval 1.97-3.96; and  $\geq 60$  years: 6.04, 4.21-8.67). The odds were lower in female patients (0.63, 0.49-0.81), patients residing in rural areas (0.74, 0.58-0.94) and patients without health insurance (0.59, 0.43-0.80). The odds were higher in single/divorced/widowed patients compared to married patients (2.11, 1.32-3.37).

**Conclusions** A large percentage of patients with T2DM in the tertiary care department in Ningbo, China had multimorbidity and the associated factors were identified. The

1  
2  
3  
4 findings could be used in developing, evaluating and implementing interventions aimed  
5  
6 at improving outcomes in T2DM patients with multimorbidity.

7  
8 **Keywords**

9  
10 Multimorbidity, Type 2 diabetes, China  
11  
12

13  
14 **Strengths and limitations of the study**

- 15  
16  
17  
18  
19  
20  
21  
22  
23  
24  
25  
26  
27  
28  
29  
30  
31  
32  
33  
34  
35  
36  
37  
38  
39  
40  
41  
42  
43  
44  
45  
46  
47  
48  
49  
50  
51  
52  
53  
54  
55  
56  
57  
58  
59  
60
- Ours was the first study to investigate multimorbidity among patients with type 2 diabetes in Ningbo and in the broader Zhejiang Province and China.
  - In our database, all the conditions are coded using the International Classification of Diseases, 10th edition (ICD-10), and we included all the chronic conditions in our study.
  - Our study had extremely low missing data and the multiple logistic regression analysis included a sample with missing data for the adjusted variable.
  - Being a cross-sectional study, the causal relationship between variables and multimorbidity could not be determined.
  - Our study had the usual routinely collected data issues as an existing medical records database was used – its main purpose is medical management and not research.

## Introduction

Ningbo is an economically developed Chinese city in the Zhejiang Province. Non-communicable diseases, mental health conditions and infectious diseases are prevalent in the city.<sup>1</sup> One such non-communicable disease is type 2 diabetes (T2DM), a complex metabolic disorder. China has the largest T2DM epidemic in the world, and in Ningbo, its prevalence in 40+ years adults is 21%.<sup>2</sup> In real-life, T2DM is rarely presented in isolation and is accompanied by other chronic conditions.<sup>3</sup>

Globally, research on multimorbidity is a conceptually new area. Multimorbidity is commonly defined as having two or more chronic conditions in the same individual.<sup>4</sup> It accelerates the progression of individual chronic conditions;<sup>5</sup> brings in other physical and mental conditions and even premature mortality;<sup>6 7</sup> negatively affects the overall health, wellbeing and functioning;<sup>8 9</sup> and leads to high treatment burden, healthcare utilisation and expenditure and loss of economic output.<sup>10-13</sup>

To date, no study has been undertaken to investigate multimorbidity among patients with T2DM in Ningbo. The study objectives were to determine the prevalence of multimorbidity among patients with T2DM and factors independently associated with multimorbidity. This knowledge could be used in developing, evaluating and implementing interventions aimed at improving outcomes in T2DM patients with multimorbidity.

## Methods

### ***Study location, study design, data source and study period***

We conducted the study in a tertiary care department in Ningbo, China - Department of Endocrinology and Metabolism, Ningbo First Hospital. This tertiary care hospital is responsible for the delivery of specialist healthcare services and for medical education and research.<sup>14 15</sup> Local people and people from surrounding areas can visit this hospital as no referral is required from the general practitioner.<sup>14</sup> An existing computerised medical records database was used for conducting this cross-sectional

1  
2  
3  
4 study. The database contains information on all inpatients. Data are entered by the  
5  
6 medico-nursing team. The quality check of the data and the overall database  
7  
8 management are the responsibility of an independent group of hospital staff. All the  
9  
10 conditions are coded using the International Classification of Diseases, 10th edition  
11  
12 (ICD-10). This retrospective study included eight years of data, from 1 January 2012  
13  
14 to 31 December 2019, and information was available on 6755 patients.  
15  
16

### 17 ***Study population and study inclusion and exclusion criteria***

18  
19 Adult patients ( $\geq 18$  years) with T2DM were included. If a patient was admitted more  
20  
21 than once during the study period, data pertinent to the last admission were extracted  
22  
23 to obtain the most up to date information on chronic conditions. Individuals with  
24  
25 gestational diabetes, type 1 diabetes, secondary diabetes and unknown type of  
26  
27 diabetes were excluded.  
28  
29

### 30 ***Study variables***

31  
32 We extracted and categorised the following information from the database:  
33  
34

- 35 • age (18-39 years, 40-59 years or  $\geq 60$  years),
  - 36 • sex (male or female),
  - 37 • education (university/college, class 7-12, class 1-6 or no qualification),
  - 38 • occupation (manual worker (i.e., more physical work than mental work), non-  
39 manual worker (i.e., more mental work than physical work) or never  
40 worked/retired),
  - 41 • marital status (married or single/divorced/widowed),
  - 42 • residence (urban or rural using the “hukou” system (i.e., the Chinese household  
43 registration system)),
  - 44 • health insurance,
  - 45 • smoking (current status),
  - 46 • alcohol drinking (current status),
  - 47 • duration of T2DM ( $\leq 1$  year,  $>1-5$  years,  $>5-10$  years or  $>10$  years),
- 48  
49  
50  
51  
52  
53  
54  
55  
56  
57  
58  
59  
60



- blood glucose level (glycated haemoglobin (HbA1c <7% (good) or ≥7% (poor)), estimated using the high-performance liquid chromatographic (HPLC) method and D-10 Hemoglobin Analyzer (Bio-Rad, USA)).

In addition, information on multimorbidity was extracted. Multimorbidity was defined as having T2DM and at least one other chronic condition, each one was either a physical non-communicable disease of long duration (≥3 months), a mental health condition of long duration (≥3 months) or an infectious disease of long duration (≥3 months).<sup>16 17</sup> In our study, a T2DM specific complication, such as diabetic neuropathy, diabetic nephropathy, diabetic retinopathy or diabetic foot, was not counted as a chronic condition in multimorbidity. This is because these microvascular complications are in relation to the index disease (i.e., T2DM).<sup>18 19</sup>

### ***Ethics***

The Research Ethics Committee of Ningbo First Hospital, China approved the study (2020-R106).

### ***Patient and public involvement***

Patient and public were not involved in the study.

### ***Statistical analyses***

We calculated numbers and percentages for categorical variables and means and standard deviations (SDs) for normally distributed continuous variables. We used simple logistic regression method to investigate the association between different variables and multimorbidity. We developed a multiple logistic regression model to find any independent association. For this, we used the backward stepwise regression analysis and included all the variables. Additionally, we did a sensitivity analysis - in the multiple logistic regression model, we included only those variables that had a p-value of ≤0.20 in simple logistic regressions. We calculated odds ratios (ORs) and 95% confidence intervals (CIs). We used IBM SPSS Statistics version 26.0 for Windows for statistical analyses.

## Results

4777 patients satisfied the eligibility criteria. The mean ( $\pm$ SD) age of patients was 64.2 ( $\pm$ 14.2) years and around 52% (n=2482) of them were male. Over eight years, the prevalence of multimorbidity among patients with T2DM was 93.7%. The year-wise (from 2012 to 2019) prevalence was 96.9%, 95.0%, 92.9%, 95.5%, 93.2%, 91.5%, 94.0% and 93.6%, respectively.

Figure 1 shows the number of other chronic conditions in our study (in addition to T2DM). Those who had multimorbidity, the mean ( $\pm$ SD) number of other chronic conditions was 3 ( $\pm$ 1). 55.6% of patients had  $\geq$ 3 other chronic conditions. Table 1 reports the most common other chronic conditions in our study (in addition to T2DM). Essential hypertension (49.4%), disorders of lipoprotein metabolism and other lipidaemias (33.7%), nontoxic thyroid nodule (22.8%), fatty change of liver (20.6%) and cataract (10.7%) were the five most prevalent chronic conditions.

Table 2 reports the characteristics of the study participants. We found that multimorbidity was associated with age, sex, education, occupation, marital status, residence, health insurance and duration of T2DM. Table 3 reports the multiple backward stepwise logistic regression analysis for determining factors independently associated with multimorbidity. The odds of multimorbidity increased with the age of patients (18-39 years: 1; 40-59 years: OR 2.80, 95% CI 1.97-3.96; and  $\geq$ 60 years: 6.04, 4.21-8.67). The odds were lower in female patients (0.63, 0.49-0.81), patients residing in rural areas (0.74, 0.58-0.94) and patients without health insurance (0.59, 0.43-0.80). The odds were higher in single/divorced/widowed patients compared to married patients (2.11, 1.32-3.37). In the sensitivity analysis, we found the same results.

## Discussion

In our tertiary care department in Ningbo, China, around 94% of patients with T2DM had multimorbidity. We could not find any similar study conducted among patients with

1  
2  
3  
4 T2DM in China, but in two other studies conducted among community-dwelling and  
5 hospitalised older adults, the prevalence of multimorbidity was around 49% and 69%,  
6 respectively.<sup>20 21</sup> This could be due to the difference in the population characteristics  
7 and the way chronic conditions were measured. Several studies have been conducted  
8 on this topic in high-income countries like the United States and in Europe.<sup>22-26</sup> All these  
9 studies, including our study, have highlighted the fact that multimorbidity is high among  
10 patients with T2DM.<sup>22-26</sup> In our study, those who had multimorbidity, the average  
11 number of other chronic conditions was three. Around 56% of patients had  $\geq 3$  other  
12 chronic conditions, and this is similar to what other studies have found.<sup>22 23</sup> A  
13 systematic review and meta-analysis summarising the prevalence and associated  
14 factors of multimorbidity in different geographical locations will be helpful.

15  
16  
17  
18  
19  
20  
21  
22  
23  
24  
25  
26  
27 In our study, essential hypertension, disorders of lipoprotein metabolism and other  
28 lipidaemias, nontoxic thyroid nodule, fatty change of liver and cataract were the five  
29 most prevalent chronic conditions. The overall profile is similar to what other studies  
30 have found.<sup>23,24</sup> The pathophysiological connection between T2DM and cardiovascular  
31 diseases is well known.<sup>27 28</sup> Similarly, T2DM and thyroid diseases are the two most  
32 common chronic conditions of the endocrine system, and patients with T2DM are more  
33 likely to develop thyroid nodule, which could be due to insulin resistance.<sup>29 30</sup> In our  
34 population and setting, around 72% of patients with T2DM were prescribed  
35 polypharmacy.<sup>31</sup> A specific medicine may be used for managing a chronic condition  
36 and the same may be contraindicated in another chronic condition. This needs to be  
37 taken into consideration when managing multimorbidity among patients with T2DM.<sup>32</sup>  
38 This point is valid even for preventing new chronic conditions like cardiovascular  
39 diseases among patients with T2DM. For example, the usage of a new generation of  
40 hypoglycaemic medicines, such as glucagon-like peptide 1 (GLP-1) receptor agonists  
41 and sodium-glucose cotransporter-2 (SGLT-2) inhibitors, reduces the risk of  
42 cardiovascular diseases.<sup>33 34</sup>

1  
2  
3  
4 We found that the odds of multimorbidity increased with the age of patients. Age is one  
5 of the most well studied and consistent determinants of multimorbidity.<sup>12 35</sup> Age-related  
6 organ degeneration is a natural process and can bring in many chronic conditions.<sup>36</sup>  
7  
8 However, it should be noted that multimorbidity is not equal to ageing and limited to  
9 older age alone.<sup>37</sup> In our study, the prevalence of multimorbidity was around 80% and  
10 91% in the 18-39 and 40-59 years age groups, respectively. We found that the odds  
11 of multimorbidity were lower in females than in males. The finding is consistent with  
12 other studies.<sup>22 25</sup> This could be due to the differences at the biological level. Another  
13 potential reason could be reporting differences in sex-specific chronic conditions. For  
14 example, female patients with T2DM often present atypical symptoms of  
15 cardiovascular diseases.<sup>38</sup> Even the standard non-invasive diagnostic tests perform  
16 better in men than in women.<sup>39</sup> All these hinder the diagnosis of cardiovascular  
17 diseases in women. Another example is benign prostatic hyperplasia, which was one  
18 of the most common chronic conditions in our study. This chronic condition was  
19 diagnosed because of the compulsory ultrasound scan of the urinary system of  
20 patients with T2DM at our hospital for possible kidney comorbidities. In comparison,  
21 the gynaecological examination is not a routine examination in women with T2DM.  
22  
23  
24  
25  
26  
27  
28  
29  
30  
31  
32  
33  
34  
35  
36  
37  
38

39 We found that the odds of multimorbidity were lower in patients residing in rural areas  
40 compared to urban areas. The finding is consistent with other studies.<sup>40 41</sup> This could  
41 be due to the economic growth, urbanisation and its negative consequences like  
42 unhealthy lifestyle.<sup>42-44</sup> The link between an unhealthy lifestyle and chronic conditions  
43 (particularly non-communicable diseases) is well established.<sup>45</sup> A similar association  
44 with multimorbidity has also emerged.<sup>46</sup> The other reason could be – rural patients in  
45 China have limited access to healthcare and thus, may undergo fewer diagnostic tests  
46 and confirmation of chronic conditions.<sup>47</sup>  
47  
48  
49  
50  
51  
52  
53  
54  
55

56 We found that the odds of multimorbidity were lower in patients without health  
57 insurance compared to those with health insurance. This could be due to the fact that  
58 over 90% of the Chinese population have some sort of health insurance<sup>48</sup> and these  
59  
60

1  
2  
3  
4 patients may undergo more diagnostic tests (within the scope of their health insurance  
5 policy) and confirmation of chronic conditions.<sup>49</sup> We found that the odds of  
6 multimorbidity were higher in single/divorced/widowed patients compared to married  
7 patients. The finding is consistent with other studies.<sup>50 51</sup> In general, the spouse of a  
8 married patient looks after them, both physically and mentally, and this could help them  
9 in managing their existing chronic conditions and preventing new chronic conditions to  
10 develop.<sup>52 53</sup>

11  
12  
13  
14  
15  
16  
17  
18  
19 Apart from the already mentioned strengths and weaknesses, the study has some  
20 more strengths and weaknesses. Multimorbidity is a less explored area in China, and  
21 to the best of our knowledge, this was the first study to explore multimorbidity among  
22 patients with T2DM in Ningbo and in the broader Zhejiang Province and China. Unlike  
23 other studies which included only older adults,<sup>20 21 51</sup> we included adults without any  
24 age restriction. It should be noted that multimorbidity is not equal to ageing and limited  
25 to older age alone.<sup>37</sup> Unlike other studies where chronic conditions in multimorbidity  
26 were self-reported by patients using a predetermined list of selected chronic  
27 conditions,<sup>20 24</sup> we used a holistic approach. In the database, all the conditions are  
28 coded using the International Classification of Diseases, 10th edition (ICD-10), and we  
29 included all the chronic conditions in our study. This also minimised the possibility of  
30 recall bias in our study. Our study had extremely low missing data and the multiple  
31 logistic regression analysis included a sample with missing data for the adjusted  
32 variable. Being a cross-sectional study, the causal relationship between variables and  
33 multimorbidity could not be determined. We propose conducting a longitudinal study  
34 to explore the effect of various factors on multimorbidity, including factors considered  
35 in this study and some other factors like physical activity and diet that are not present  
36 in our database and could not be adjusted for in the models. Our study had the usual  
37 routinely collected data issues as an existing medical records database was used – its  
38 main purpose is medical management and not research. The findings of our hospital-  
39 based study could be valid in similar populations and settings. We suggest conducting  
40 a population-based study that might show a distinct picture of the issue.

1  
2  
3  
4  
5  
6 In conclusion, we found that a large percentage of patients with T2DM in the tertiary  
7 care department in Ningbo, China had multimorbidity and identified the associated  
8 factors. The findings could be used in developing, evaluating and implementing  
9 interventions aimed at improving outcomes in T2DM patients with multimorbidity.  
10  
11  
12  
13

14  
15 **Acknowledgements** The authors thank the patients and Yida Li for the management  
16 and organisation of the original data.  
17  
18  
19

20  
21 **Contributors** JL and KC designed the study. XL and KC analysed the data and wrote  
22 the first draft of the manuscript. SX and YC contributed to patient registration and data  
23 entry. XL contributed to data cleaning. XL, KC, SX, YC, MX, LL and JL revised it  
24 critically for important intellectual content and approved the final version.  
25  
26  
27  
28  
29

30  
31 **Funding** The work was supported by the Medical Health Science and Technology  
32 Project of Zhejiang Province (Grant No. 2019KY562) and the Major Program of Social  
33 Development of Ningbo Science and Technology Bureau (Grant No. 2019C50094).  
34  
35  
36  
37

38  
39 **Competing interests** None declared.  
40  
41

42  
43 **Ethics approval** The Research Ethics Committee of Ningbo First Hospital, China  
44 approved the study (2020-R106).  
45  
46  
47

48  
49 **Data sharing statement** The dataset will be available upon request unless there are  
50 legal or ethical reasons for not doing so.  
51  
52  
53

## 54 **References**

55 1. Health and Family Planning Commission of Ningbo Municipality. Prevention and  
56 treatment of chronic diseases in Ningbo. <http://www.cnnb.com.cn/nbzfxwfbh/system/2014/05/22/008068694.shtml> (accessed  
57 25 Apr 2020).  
58  
59  
60

- 1  
2  
3  
4  
5  
6  
7  
8  
9  
10  
11  
12  
13  
14  
15  
16  
17  
18  
19  
20  
21  
22  
23  
24  
25  
26  
27  
28  
29  
30  
31  
32  
33  
34  
35  
36  
37  
38  
39  
40  
41  
42  
43  
44  
45  
46  
47  
48  
49  
50  
51  
52  
53  
54  
55  
56  
57  
58  
59  
60
2. Yao DZ, Sun XH, Li JH. Prevalence and risk factors of diabetes in people over 40 years of age in Ningbo city area. *Modern Practical Medicine* 2016;28:1343-45.
3. Australian Bureau of Statistics. *National Health Survey: First Result, 2014-15*. Canberra: Australian, 2015.
4. World Health Organization. *Multimorbidity*. Geneva: Switzerland, 2016.
5. Abegunde DO, Mathers CD, Adam T, *et al*. The Burden and costs of chronic diseases in low-income and middle-income countries. *Lancet* 2007; 8;370:1929-38.
6. Arokiasamy P, Uttamacharya U, Jain K, *et al*. The Impact of multimorbidity on adult physical and mental health in low- and middle-income countries: what does the study on global ageing and adult health (SAGE) reveal? *BMC Med* 2015;13:178.
7. Wei MY, Mukamal KJ. Multimorbidity, mortality, and long-term physical functioning in 3 prospective cohorts of community-dwelling adults. *Am J Epidemiol* 2018; 187:103-12.
8. Stubbs B, Vancampfort D, Veronese N, *et al*. Multimorbidity and perceived stress: a population-based cross-sectional study among older adults across six low- and middle-income countries. *Maturitas* 2018;107:84-91.
9. Ryan A, Wallace E, O'Hara P, *et al*. Multimorbidity and functional decline in community-dwelling adults: a systematic review. *Health Qual Life Outcomes* 2015;13:168.
10. Lee JT, Hamid F, Pati S, *et al*. Impact of noncommunicable disease multimorbidity on healthcare utilisation and out-of-pocket expenditures in middle-income countries: cross sectional analysis. *PLoS One* 2015;10:e0127199.
11. Paddison CA, Saunders CL, Abel GA, *et al*. Why do patients with multimorbidity in England report worse experiences in primary care? evidence from the general practice patient survey. *BMJ Open* 2015;5:e006172.
12. Palladino R, Lee JT, Ashworth M, *et al*. Associations between multimorbidity, healthcare utilisation and health status: evidence from 16 European countries. *Age Ageing* 2016;45:431-5.
13. Ubalde-Lopez M, Delclos GL, Benavides FG, *et al*. Measuring multimorbidity in a working population: the effect on incident sickness absence. *Int Arch Occup Environ Health* 2016;89:667-78.

- 1  
2  
3 14. Ningbo First Hospital. Hospital Introduction.  
4 <http://www.nbdyyy.com/col/col100/index.html> (accessed 25 Apr 2020).  
5  
6  
7 15. Ministry of Health of the People's Republic of China. *The measures for the*  
8 *administration of the hospital grade*. Beijing: Ministry of Health of the People's  
9 Republic of China, 1989.  
10  
11  
12 16. The Academy of Medical Sciences. Multimorbidity: a priority for global health  
13 research (2018). <https://acmedsci.ac.uk/policy/policy-projects/multimorbidity>  
14 (accessed 25 Apr 2020).  
15  
16  
17 17. Bernell S, Howard SW. Use your words carefully: what is a chronic disease? *Front*  
18 *Public Health* 2016;4:159.  
19  
20  
21 18. Radner H, Yoshida K, Smolen JS, et al. Multimorbidity and rheumatic conditions-  
22 enhancing the concept of comorbidity. *Nat Rev Rheumatol* 2014;10:252-6.  
23  
24  
25 19. Valderas JM, Starfield B, Sibbald B, et al. Defining comorbidity: implications for  
26 understanding health and health services. *Ann Fam Med* 2009;7:357-63.  
27  
28  
29 20. Gu J, Chao J, Chen W, et al. Multimorbidity in the community-dwelling elderly in  
30 urban China. *Arch Gerontol Geriatr* 2017;68:62-7.  
31  
32  
33 21. Zhang L, Ma L, Sun F, et al. A multicenter study of multimorbidity in older adult  
34 inpatients in China. *J Nutr Health Aging* 2020;24:269-76.  
35  
36  
37 22. Alonso-Morán E, Orueta JF, Esteban JI, et al. Multimorbidity in people with type 2  
38 diabetes in the Basque country (Spain): prevalence, comorbidity clusters and  
39 comparison with other chronic patients. *Eur J Intern Med* 2015;26:197-202.  
40  
41  
42 23. Lin PJ, Kent DM, Winn A, et al. Multiple chronic conditions in type 2 diabetes  
43 mellitus: prevalence and consequences. *Am J Manag Care* 2015;21:e23-34.  
44  
45  
46 24. Teljeur C, Smith SM, Paul G, et al. Multimorbidity in a cohort of patients with type  
47 2 diabetes. *Eur J Gen Pract* 2013;19:17-22.  
48  
49  
50 25. Iglay K, Hannachi H, Howie PJ, et al. Prevalence and co-prevalence of  
51 comorbidities among patients with type 2 diabetes mellitus. *Curr Med Res Opin*  
52 2016;32:1243-52.  
53  
54  
55 26. Hermans MP, Dath N. Prevalence and co-prevalence of comorbidities in Belgian  
56 patients with type 2 diabetes mellitus: a transversal, descriptive study. *Acta Clin*  
57 *Belg* 2018;73:68-74.  
58  
59  
60



- 1  
2  
3 27. Laakso M, Kuusisto J. Insulin resistance and hyperglycaemia in cardiovascular  
4 disease development. *Nat Rev Endocrinol* 2014;10:293-302.  
5  
6  
7 28. Henning RJ. Type-2 diabetes mellitus and cardiovascular disease. *Future*  
8 *Cardiol* 2018;14:491-509.  
9  
10  
11 29. Tang Y, Yan T, Wang G, *et al*. Correlation between insulin resistance and thyroid  
12 nodule in type 2 diabetes mellitus. *Int J Endocrinol* 2017;2017:1617458.  
13  
14  
15 30. Zhang HM, Feng QW, Niu YX, *et al*. Thyroid nodules in type 2 diabetes mellitus.  
16 *Curr Med Sci* 2019;39:576-81.  
17  
18  
19 31. Li J, Chattopadhyay K, Xu M, *et al*. Prevalence and predictors of polypharmacy  
20 prescription among type 2 diabetes patients at a tertiary care department in Ningbo,  
21 China: a retrospective database study. *PLoS One* 2019;14:e0220047.  
22  
23  
24 32. Marengoni A, Onder G. Guidelines, polypharmacy, and drug-drug interactions in  
25 patients with multimorbidity. *BMJ* 2015;350:h1059.  
26  
27  
28 33. Zelniker TA, Wiviott SD, Raz I, *et al*. SGLT2 inhibitors for primary and secondary  
29 prevention of cardiovascular and renal outcomes in type 2 diabetes: a systematic  
30 review and meta-analysis of cardiovascular outcome trials. *Lancet* 2019;393:31-9.  
31  
32  
33 34. Bethel MA, Patel RA, Merrill P, *et al*. Cardiovascular outcomes with glucagon-like  
34 peptide-1 receptor agonists in patients with type 2 diabetes: a meta-analysis. *Lancet*  
35 *Diabetes Endocrinol* 2018;6:105-13.  
36  
37  
38 35. Afshar S, Roderick PJ, Kowal P, *et al*. Multimorbidity and the inequalities of global  
39 ageing: a cross-sectional study of 28 countries using the world health surveys. *BMC*  
40 *Public Health* 2015;15:776.  
41  
42  
43 36. King M, Lipsky MS. Clinical implications of aging. *Dis Mon* 2015;61:467-74.  
44  
45  
46 37. van Oostrom SH, Gijzen R, Stirbu I, *et al*. Time trends in prevalence of chronic  
47 diseases and multimorbidity not only due to aging: data from general practices and  
48 health surveys. *PLoS One* 2016;11:e0160264.  
49  
50  
51 38. Wada H, Miyauchi K, Daida H. Gender Differences in the clinical features and  
52 outcomes of patients with coronary artery disease. *Expert Rev Cardiovasc Ther*  
53 2019;17:127-33.  
54  
55  
56 39. Shah AS, Griffiths M, Lee KK, *et al*. High sensitivity cardiac troponin and the under-  
57 diagnosis of myocardial infarction in women: prospective cohort study. *BMJ*  
58 2015;350:g7873.  
59  
60

- 1  
2  
3  
4  
5 40. Yi JY, Kim H, Chi I. Urban-rural differences in multimorbidity and associated factors  
6 in China and Korea: a population-based survey study. *Geriatr Gerontol Int*  
7 2019;19:1157-64.  
8  
9  
10 41. Yao SS, Cao GY, Han L, *et al*. Prevalence and patterns of multimorbidity in a  
11 nationally representative sample of older Chinese: results from CHARLS. *J Gerontol*  
12 *A Biol Sci Med Sci* 2019;glz185.  
13  
14  
15 42. Zhu W, Chi A, Sun Y. Physical activity among older Chinese adults living in urban  
16 and rural areas: a review. *J Sport Health Sci* 2016;5:281-6.  
17  
18  
19 43. Muntner P, Gu D, Wildman RP, *et al*. Prevalence of physical activity among  
20 Chinese adults: results from the international collaborative study of cardiovascular  
21 disease in Asia. *Am J Public Health* 2005;95:1631-6.  
22  
23  
24 44. Miao J, Wu X. Urbanization, socioeconomic status and health disparity in China.  
25 *Health Place* 2016;42:87-95.  
26  
27  
28 45. World Health Organization. *Global action plan for the prevention and control of*  
29 *NCD 2013-2020*. Geneva: Switzerland, 2013.  
30  
31  
32 46. Vancampfort D, Koyanagi A, Ward PB, *et al*. Chronic physical conditions,  
33 multimorbidity and physical activity across 46 low- and middle-income countries. *Int J*  
34 *Behav Nutr Phys Act* 2017;14:6.  
35  
36  
37 47. Liu Z, Albanese E, Li S, *et al*. Chronic disease prevalence and care among the  
38 elderly in urban and rural Beijing, China - a 10/66 dementia research group cross-  
39 sectional survey. *BMC Public Health* 2009;9:394.  
40  
41  
42 48. Zhao C, Wang C, Shen C, *et al*. China's achievements and challenges in improving  
43 health insurance coverage. *Drug Discov Ther* 2018;12:1-6.  
44  
45  
46 49. Yang C, Huang Z, Sun K, *et al*. Comparing the economic burden of type 2 diabetes  
47 mellitus patients with and without medical insurance: a cross-sectional study in China.  
48 *Med Sci Monit* 2018;24:3039-102.  
49  
50  
51 50. Park B, Ock M, Lee HA, *et al*. Multimorbidity and health-related quality of life in  
52 Koreans aged 50 or older using KNHANES 2013-2014. *Health Qual Life Outcomes*  
53 2018;16:186.  
54  
55  
56 51. Aminisani N, Stephens C, Allen J, *et al*. Socio-demographic and lifestyle factors  
57 associated with multimorbidity in New Zealand. *Epidemiol Health* 2020;42:e2020001.  
58  
59  
60

52. Stroebe M, Schut H, Stroebe W. Health outcomes of bereavement. *Lancet* 2007; 370:1960-73.

53. Parajuli J, Saleh F, Thapa N, Ali L. Factors associated with nonadherence to diet and physical activity among Nepalese type 2 diabetes patients: a cross sectional study. *BMC Res Notes* 2014;7:758.

Figure 1. Number of other chronic conditions in our study (in addition to T2DM).

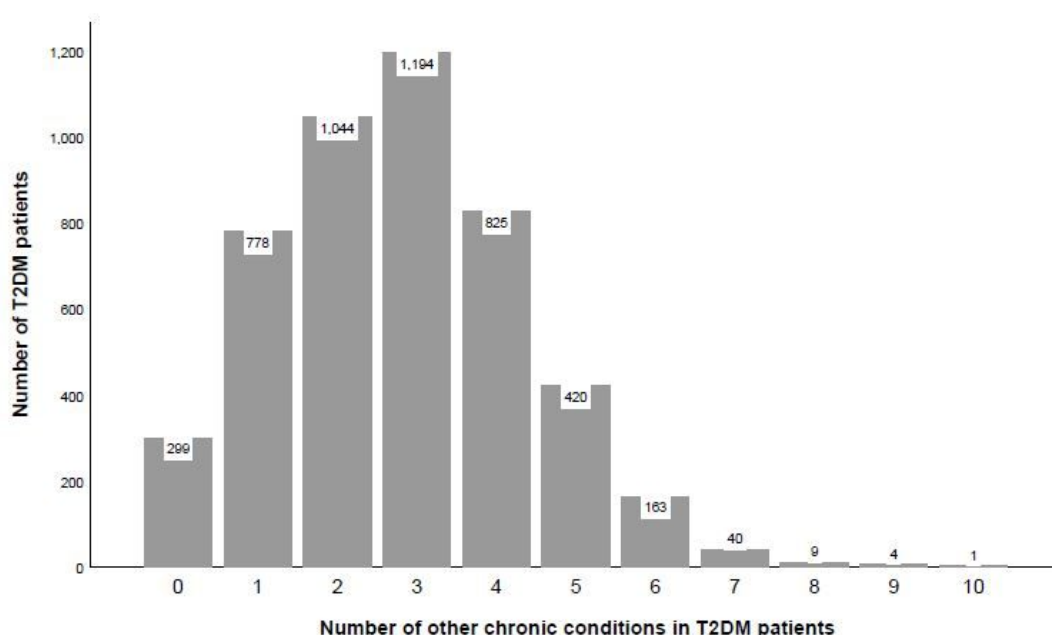

Table 1. Most common other chronic conditions in our study (in addition to T2DM).

| Most common other chronic conditions (based on ICD-10 classification) | Patients with T2DM n (%) |
|-----------------------------------------------------------------------|--------------------------|
| Essential hypertension (I10)                                          | 2362 (49.4)              |
| Disorders of lipoprotein metabolism and other lipidaemias (E78)       | 1612 (33.7)              |
| Nontoxic thyroid nodule (E04)                                         | 1088 (22.8)              |
| Fatty (change of) liver (K76)                                         | 984 (20.6)               |
| Cataract (H26)                                                        | 512 (10.7)               |
| Chronic ischemic heart disease (I25)                                  | 455 (9.5)                |
| Atherosclerosis (I70)                                                 | 411 (8.6)                |
| Osteoporosis (M81)                                                    | 348 (7.3)                |
| Cerebral infarction (I63)                                             | 341 (7.1)                |
| Benign prostatic hyperplasia (N40)                                    | 303 (12.2*)              |

|                                                                              |           |
|------------------------------------------------------------------------------|-----------|
| Abnormal findings on diagnostic imaging of lung (R91)                        | 287 (6.0) |
| Thoracic, thoracolumbar, and lumbosacral intervertebral disc disorders (M51) | 260 (5.4) |
| Obesity (E66)                                                                | 177 (3.7) |
| Cervical disc disorders (M50)                                                | 161 (3.4) |
| Chronic viral hepatitis (B18)                                                | 138 (2.9) |
| Sleep disorders (G47)                                                        | 135 (2.8) |
| Gout (M10)                                                                   | 132 (2.8) |
| Disorders of purine and pyrimidine metabolism (E79)                          | 127 (2.7) |
| Atrial fibrillation and flutter (I48)                                        | 118 (2.5) |
| Gastro-esophageal reflux disease (K21)                                       | 111 (2.3) |

\*In 2482 males.

Table 2. Characteristics of the study participants.

|                                 | Total<br>(4777) | Multimorbidity<br>No (299)<br>n (%) | Multimorbidity<br>Yes (4478)<br>n (%) | Unadjusted OR<br>(95% CI) | P value |
|---------------------------------|-----------------|-------------------------------------|---------------------------------------|---------------------------|---------|
| <b>Age (years)</b>              |                 |                                     |                                       |                           | <0.001  |
| 18-39                           | 308             | 63 (20.5)                           | 245 (79.5)                            | 1                         |         |
| 40-59                           | 1360            | 120 (8.8)                           | 1240 (91.2)                           | 2.66 (1.90,3.71)          |         |
| ≥60                             | 3109            | 116 (3.7)                           | 2993 (96.3)                           | 6.64 (4.75,9.26)          |         |
| <b>Sex</b>                      |                 |                                     |                                       |                           | 0.008   |
| Male                            | 2482            | 133 (5.4)                           | 2349 (94.6)                           | 1                         |         |
| Female                          | 2295            | 166 (7.2)                           | 2129 (92.8)                           | 0.73 (0.57,0.92)          |         |
| <b>Education</b>                |                 |                                     |                                       |                           | 0.005   |
| University/college              | 545             | 47 (8.6)                            | 498 (91.4)                            | 1                         |         |
| Class 7-12                      | 1927            | 136 (7.1)                           | 1791 (92.9)                           | 1.24 (0.88,1.76)          |         |
| Class 1-6                       | 1574            | 80 (5.1)                            | 1494 (94.9)                           | 1.76 (1.21,2.56)          |         |
| No qualification                | 731             | 36 (4.9)                            | 695 (95.1)                            | 1.82 (1.16,2.86)          |         |
| <b>Occupation</b>               |                 |                                     |                                       |                           | <0.001  |
| Manual worker                   | 1088            | 74 (6.8)                            | 1014 (93.2)                           | 1                         |         |
| Non-manual worker               | 1884            | 152 (8.1)                           | 1732 (91.9)                           | 0.83 (0.62,1.10)          |         |
| Never worked/retired            | 1805            | 73 (4.0)                            | 1732 (96.0)                           | 1.73 (1.24,2.41)          |         |
| <b>Marital status</b>           |                 |                                     |                                       |                           | 0.008   |
| Married                         | 4207            | 278 (6.6)                           | 3929 (93.4)                           | 1                         |         |
| Single/divorced/widowed         | 570             | 21 (3.7)                            | 549 (96.3)                            | 1.85 (1.18,2.91)          |         |
| <b>Residence</b>                |                 |                                     |                                       |                           | <0.001  |
| Urban                           | 2815            | 145 (5.2)                           | 2670 (94.8)                           | 1                         |         |
| Rural                           | 1962            | 154 (7.8)                           | 1808 (92.2)                           | 0.64 (0.50,0.81)          |         |
| <b>Health insurance</b>         |                 |                                     |                                       |                           | <0.001  |
| Yes                             | 4211            | 232 (5.5)                           | 3979 (94.5)                           | 1                         |         |
| No                              | 564             | 67 (11.9)                           | 497 (88.1)                            | 0.43 (0.33,0.58)          |         |
| <b>Smoking (current status)</b> |                 |                                     |                                       |                           | 0.073   |
| No                              | 3714            | 245 (6.6)                           | 3469 (93.4)                           | 1                         |         |

|                                          |      |           |             |                  |        |
|------------------------------------------|------|-----------|-------------|------------------|--------|
| Yes                                      | 1063 | 54 (5.1)  | 1009 (94.9) | 1.32 (0.98,1.79) |        |
| <b>Alcohol drinking (current status)</b> |      |           |             |                  | 0.713  |
| No                                       | 4169 | 263 (6.3) | 3906 (93.7) | 1                |        |
| Yes                                      | 608  | 36 (5.9)  | 572 (94.1)  | 1.07 (0.75,1.53) |        |
| <b>Duration of T2DM (years)</b>          |      |           |             |                  | <0.001 |
| ≤1                                       | 981  | 93 (9.5)  | 888 (90.5)  | 1                |        |
| >1-5                                     | 880  | 60 (6.8)  | 820 (93.2)  | 1.43 (1.02,2.01) |        |
| >5-10                                    | 1247 | 74 (5.9)  | 1173 (94.1) | 1.66 (1.21,2.28) |        |
| >10                                      | 1669 | 72 (4.3)  | 1597 (95.7) | 2.32 (1.69,3.19) |        |
| <b>Blood glucose level (HbA1c)</b>       |      |           |             |                  | 0.458  |
| <7%                                      | 899  | 64 (7.1)  | 835 (92.9)  | 1                |        |
| ≥7%                                      | 3748 | 226 (6.0) | 3522 (94.0) | 1.19 (0.90,1.59) |        |
| Unknown                                  | 130  | 9 (6.9)   | 121 (93.1)  | 1.03 (0.50,2.12) |        |

Table 3. Multiple backward stepwise logistic regression analysis for determining factors independently associated with multimorbidity.

|                         | <b>Adjusted OR (95% CI)</b> | <b>P value</b> |
|-------------------------|-----------------------------|----------------|
| <b>Age (years)</b>      |                             | <0.001         |
| 18-39                   | 1                           |                |
| 40-59                   | 2.80 (1.97,3.96)            |                |
| ≥60                     | 6.04 (4.21,8.67)            |                |
| <b>Sex</b>              |                             | <0.001         |
| Male                    | 1                           |                |
| Female                  | 0.63 (0.49,0.81)            |                |
| <b>Marital status</b>   |                             | 0.002          |
| Married                 | 1                           |                |
| Single/divorced/widowed | 2.11 (1.32,3.37)            |                |
| <b>Residence</b>        |                             | 0.014          |
| Urban                   | 1                           |                |
| Rural                   | 0.74 (0.58,0.94)            |                |
| <b>Health insurance</b> |                             | <0.001         |
| Yes                     | 1                           |                |
| No                      | 0.59 (0.43,0.80)            |                |

**STROBE 2007 (v4) Statement—Checklist of items that should be included in reports of *cross-sectional studies***

| Section/Topic                | Item # | Recommendation                                                                                                                                                                       | Reported on page # |
|------------------------------|--------|--------------------------------------------------------------------------------------------------------------------------------------------------------------------------------------|--------------------|
| <b>Title and abstract</b>    | 1      | (a) Indicate the study's design with a commonly used term in the title or the abstract                                                                                               | 1,2                |
|                              |        | (b) Provide in the abstract an informative and balanced summary of what was done and what was found                                                                                  | 2,3                |
| <b>Introduction</b>          |        |                                                                                                                                                                                      |                    |
| Background/rationale         | 2      | Explain the scientific background and rationale for the investigation being reported                                                                                                 | 4                  |
| Objectives                   | 3      | State specific objectives, including any prespecified hypotheses                                                                                                                     | 4                  |
| <b>Methods</b>               |        |                                                                                                                                                                                      |                    |
| Study design                 | 4      | Present key elements of study design early in the paper                                                                                                                              | 4,5                |
| Setting                      | 5      | Describe the setting, locations, and relevant dates, including periods of recruitment, exposure, follow-up, and data collection                                                      | 4,5                |
| Participants                 | 6      | (a) Give the eligibility criteria, and the sources and methods of selection of participants                                                                                          | 5                  |
| Variables                    | 7      | Clearly define all outcomes, exposures, predictors, potential confounders, and effect modifiers. Give diagnostic criteria, if applicable                                             | 5,6                |
| Data sources/<br>measurement | 8*     | For each variable of interest, give sources of data and details of methods of assessment (measurement). Describe comparability of assessment methods if there is more than one group | 5,6                |
| Bias                         | 9      | Describe any efforts to address potential sources of bias                                                                                                                            | 5,6                |
| Study size                   | 10     | Explain how the study size was arrived at                                                                                                                                            | 5                  |
| Quantitative variables       | 11     | Explain how quantitative variables were handled in the analyses. If applicable, describe which groupings were chosen and why                                                         | 5,6                |
| Statistical methods          | 12     | (a) Describe all statistical methods, including those used to control for confounding                                                                                                | 6                  |
|                              |        | (b) Describe any methods used to examine subgroups and interactions                                                                                                                  | n/a                |
|                              |        | (c) Explain how missing data were addressed                                                                                                                                          | 6, Table2          |
|                              |        | (d) If applicable, describe analytical methods taking account of sampling strategy                                                                                                   | n/a                |
|                              |        | (e) Describe any sensitivity analyses                                                                                                                                                | 6                  |
| <b>Results</b>               |        |                                                                                                                                                                                      |                    |

|                          |     |                                                                                                                                                                                                              |                             |
|--------------------------|-----|--------------------------------------------------------------------------------------------------------------------------------------------------------------------------------------------------------------|-----------------------------|
| Participants             | 13* | (a) Report numbers of individuals at each stage of study—eg numbers potentially eligible, examined for eligibility, confirmed eligible, included in the study, completing follow-up, and analysed            | 5,7                         |
|                          |     | (b) Give reasons for non-participation at each stage                                                                                                                                                         | n/a                         |
|                          |     | (c) Consider use of a flow diagram                                                                                                                                                                           | n/a                         |
| Descriptive data         | 14* | (a) Give characteristics of study participants (eg demographic, clinical, social) and information on exposures and potential confounders                                                                     | 7, Table2                   |
|                          |     | (b) Indicate number of participants with missing data for each variable of interest                                                                                                                          | Table2                      |
| Outcome data             | 15* | Report numbers of outcome events or summary measures                                                                                                                                                         | 7, Figure 1, Table1, Table2 |
| Main results             | 16  | (a) Give unadjusted estimates and, if applicable, confounder-adjusted estimates and their precision (eg, 95% confidence interval). Make clear which confounders were adjusted for and why they were included | 7, Table2                   |
|                          |     | (b) Report category boundaries when continuous variables were categorized                                                                                                                                    | 7, Table2, Table3           |
|                          |     | (c) If relevant, consider translating estimates of relative risk into absolute risk for a meaningful time period                                                                                             | n/a                         |
| Other analyses           | 17  | Report other analyses done—eg analyses of subgroups and interactions, and sensitivity analyses                                                                                                               | 7                           |
| <b>Discussion</b>        |     |                                                                                                                                                                                                              |                             |
| Key results              | 18  | Summarise key results with reference to study objectives                                                                                                                                                     | 7,8,9,10                    |
| Limitations              | 19  | Discuss limitations of the study, taking into account sources of potential bias or imprecision. Discuss both direction and magnitude of any potential bias                                                   | 10                          |
| Interpretation           | 20  | Give a cautious overall interpretation of results considering objectives, limitations, multiplicity of analyses, results from similar studies, and other relevant evidence                                   | 7,8,9,10                    |
| Generalisability         | 21  | Discuss the generalisability (external validity) of the study results                                                                                                                                        | 10                          |
| <b>Other information</b> |     |                                                                                                                                                                                                              |                             |
| Funding                  | 22  | Give the source of funding and the role of the funders for the present study and, if applicable, for the original study on which the present article is based                                                | 11                          |

\*Give information separately for cases and controls in case-control studies and, if applicable, for exposed and unexposed groups in cohort and cross-sectional studies.

**Note:** An Explanation and Elaboration article discusses each checklist item and gives methodological background and published examples of transparent reporting. The STROBE checklist is best used in conjunction with this article (freely available on the Web sites of PLoS Medicine at <http://www.plosmedicine.org/>, Annals of Internal Medicine at <http://www.annals.org/>, and Epidemiology at <http://www.epidem.com/>). Information on the STROBE Initiative is available at [www.strobe-statement.org](http://www.strobe-statement.org).

# BMJ Open

## Prevalence of comorbidities and their associated factors in patients with type 2 diabetes at a tertiary care department in Ningbo, China: a cross-sectional study

|                                 |                                                                                                                                                                                                                                                                                                                                                                                                                                                                                                                                                                                                                                                                                     |
|---------------------------------|-------------------------------------------------------------------------------------------------------------------------------------------------------------------------------------------------------------------------------------------------------------------------------------------------------------------------------------------------------------------------------------------------------------------------------------------------------------------------------------------------------------------------------------------------------------------------------------------------------------------------------------------------------------------------------------|
| Journal:                        | <i>BMJ Open</i>                                                                                                                                                                                                                                                                                                                                                                                                                                                                                                                                                                                                                                                                     |
| Manuscript ID                   | bmjopen-2020-040532.R1                                                                                                                                                                                                                                                                                                                                                                                                                                                                                                                                                                                                                                                              |
| Article Type:                   | Original research                                                                                                                                                                                                                                                                                                                                                                                                                                                                                                                                                                                                                                                                   |
| Date Submitted by the Author:   | 17-Oct-2020                                                                                                                                                                                                                                                                                                                                                                                                                                                                                                                                                                                                                                                                         |
| Complete List of Authors:       | Li, Xueyu; Ningbo University Medical School; Ningbo City First Hospital, Department of Endocrinology and Metabolism<br>Chattopadhyay, Kaushik; University of Nottingham Division of Epidemiology and Public Health, School of Medicine<br>Xu, Shengnan; Ningbo City First Hospital, Department of Endocrinology and Metabolism<br>Chen, Yanshu; Ningbo City First Hospital, Department of Endocrinology and Metabolism<br>Xu, Miao; Ningbo City First Hospital, Department of Endocrinology and Metabolism<br>Li, Li; Ningbo City First Hospital, Department of Endocrinology and Metabolism;<br>Li, Jialin; Ningbo City First Hospital, Department of Endocrinology and Metabolism |
| <b>Primary Subject Heading</b>: | Diabetes and endocrinology                                                                                                                                                                                                                                                                                                                                                                                                                                                                                                                                                                                                                                                          |
| Secondary Subject Heading:      | Diabetes and endocrinology                                                                                                                                                                                                                                                                                                                                                                                                                                                                                                                                                                                                                                                          |
| Keywords:                       | General diabetes < DIABETES & ENDOCRINOLOGY, PUBLIC HEALTH, HEALTH SERVICES ADMINISTRATION & MANAGEMENT                                                                                                                                                                                                                                                                                                                                                                                                                                                                                                                                                                             |
|                                 |                                                                                                                                                                                                                                                                                                                                                                                                                                                                                                                                                                                                                                                                                     |

SCHOLARONE™  
Manuscripts





I, the Submitting Author has the right to grant and does grant on behalf of all authors of the Work (as defined in the below author licence), an exclusive licence and/or a non-exclusive licence for contributions from authors who are: i) UK Crown employees; ii) where BMJ has agreed a CC-BY licence shall apply, and/or iii) in accordance with the terms applicable for US Federal Government officers or employees acting as part of their official duties; on a worldwide, perpetual, irrevocable, royalty-free basis to BMJ Publishing Group Ltd ("BMJ") its licensees and where the relevant Journal is co-owned by BMJ to the co-owners of the Journal, to publish the Work in this journal and any other BMJ products and to exploit all rights, as set out in our [licence](#).

The Submitting Author accepts and understands that any supply made under these terms is made by BMJ to the Submitting Author unless you are acting as an employee on behalf of your employer or a postgraduate student of an affiliated institution which is paying any applicable article publishing charge ("APC") for Open Access articles. Where the Submitting Author wishes to make the Work available on an Open Access basis (and intends to pay the relevant APC), the terms of reuse of such Open Access shall be governed by a Creative Commons licence – details of these licences and which [Creative Commons](#) licence will apply to this Work are set out in our licence referred to above.

Other than as permitted in any relevant BMJ Author's Self Archiving Policies, I confirm this Work has not been accepted for publication elsewhere, is not being considered for publication elsewhere and does not duplicate material already published. I confirm all authors consent to publication of this Work and authorise the granting of this licence.

**Title**

Prevalence of comorbidities and their associated factors in patients with type 2 diabetes at a tertiary care department in Ningbo, China: a cross-sectional study

Xueyu Li<sup>\*1, 2</sup>, Kaushik Chattopadhyay<sup>\*3</sup>, Shengnan Xu<sup>2</sup>, Yanshu Chen<sup>2</sup>, Miao Xu<sup>2</sup>, Li Li<sup>2</sup>, Jialin Li<sup>2</sup>

<sup>1</sup>Ningbo University Medical School, Ningbo, PR China

<sup>2</sup>Department of Endocrinology and Metabolism, Ningbo First Hospital, Ningbo, PR China

<sup>3</sup>Division of Epidemiology and Public Health, School of Medicine, University of Nottingham, Nottingham, UK

\*These authors contributed equally to this work.

Corresponding author: Dr Jialin Li, e-mail; [lijialin@sina.com](mailto:lijialin@sina.com)

## Abstract

**Objectives** To determine the prevalence of comorbidities in patients with type 2 diabetes (T2DM) and identify the factors independently associated with comorbidities in a tertiary care department in Ningbo, China.

**Design** A computerised medical records database was used to conduct a cross-sectional study.

**Setting** The study was conducted in a tertiary care department in Ningbo, China.

**Participants** The study was conducted on adult patients with T2DM, and it included eight years of data, from 1 January 2012 to 31 December 2019.

**The primary outcome measure** Comorbidity was defined as the co-existence of at least one other chronic condition, i.e., either a physical non-communicable disease (duration  $\geq 3$  months), a mental health condition (duration  $\geq 3$  months), or an infectious disease (duration  $\geq 3$  months).

**Results** In total, 4777 patients with T2DM satisfied the eligibility criteria. Over eight years, the prevalence of comorbidities was 93.7%. The odds of comorbidities increased with the age of patients (18–39 years: 1; 40–59 years: odds ratio 2.80, 95% confidence interval 1.98–3.96; 60–69 years: 4.43, 3.04–6.44; and  $\geq 70$  years: 10.97, 7.17–16.77). The odds were lower in female patients (0.66, 0.51–0.84), patients residing in rural areas (0.75, 0.59–0.95), and patients without health insurance (0.62, 0.46–0.83). The odds were higher in single/divorced/widowed patients compared to those in married patients (1.95, 1.21–3.12).

**Conclusions** A large percentage of patients with T2DM in the tertiary care department in Ningbo, China, had comorbidities, and the factors associated with comorbidities were identified. The findings could be used in developing, evaluating, and

1  
2  
3  
4 implementing interventions aimed at improving outcomes in patients with T2DM with  
5 comorbidities.  
6

### 7 **Keywords**

8  
9 comorbidity, type 2 diabetes, China  
10  
11  
12

### 13 **Strengths and limitations of the study**

14  
15 Ours was the first study to investigate comorbidities in patients with type 2 diabetes in  
16 Ningbo and the broader Zhejiang Province of China.  
17

18  
19 We included all the chronic conditions in our study; they were coded using the  
20 International Classification of Diseases, 10th edition (ICD-10) in our database.  
21

22  
23 Our study had extremely low missing data and the multiple logistic regression analysis  
24 included a sample with missing data for the adjusted variable.  
25

26  
27 As it was a cross-sectional study, the causal relationship between the variables and  
28 the comorbidities could not be determined.  
29

30  
31 The high prevalence of comorbidities in our study could be due to the study setting  
32 (i.e., hospital).  
33  
34  
35  
36  
37  
38  
39  
40  
41  
42  
43  
44  
45  
46  
47  
48  
49  
50  
51  
52  
53  
54  
55  
56  
57  
58  
59  
60

## INTRODUCTION

Ningbo is an economically developed Chinese city in Zhejiang Province. The population of the city is approximately 8.2 million.[1] Non-communicable diseases, mental health conditions, and infectious diseases are prevalent in the city.[2] Of these, one of the most prevalent non-communicable diseases is type 2 diabetes (T2DM). T2DM is a chronic complex metabolic disorder. China has the largest T2DM epidemic in the world, and in Ningbo, its prevalence in adults  $\geq$  40 years of age is 21%.[3] In Ningbo, the diabetes-related mortality is 14.5 per 100,000 population.[4]

There is no international consensus regarding the best way to define comorbidity. It is usually defined as the co-existence of other conditions with an index condition (i.e., the main condition under study) where these other conditions are not consequences of the index condition.[5-7] Comorbidities accelerate the progression of individual conditions, encourage the development of other physical and mental conditions, and even lead to premature mortality.[8-10] Moreover, they negatively affect overall health, wellbeing, and functioning.[11, 12] Additionally, they lead to high treatment burden, high healthcare utilisation and expenditure, and loss of economic output.[13, 14] In real life, T2DM is rarely presented in isolation and is always accompanied by comorbidity.[15, 16]

To date, no study has been undertaken to investigate comorbidities in patients with T2DM in Ningbo. The study objectives were to determine the prevalence of comorbidities in patients with T2DM and identify the factors independently associated with comorbidities. This knowledge could be used in developing, evaluating, and implementing interventions aimed at improving outcomes in patients with T2DM with comorbidities.

## METHODS

### **Study location, study design, data source, and study period**

We conducted the study in a tertiary care department, the Department of Endocrinology and Metabolism, Ningbo First Hospital, in Ningbo, China. This tertiary care hospital delivers speciality healthcare services, provides medical education, and conducts research.[17,18] Locals and people from the surrounding areas visit this hospital as no referral is required from the general practitioner.[17] An existing computerised medical records database was used for conducting this cross-sectional study. This database contained information on all inpatients. Since it was a real-time database, new patients were added continuously. Data were entered by the medico-nursing team and an independent group of the hospital staff was responsible for assessing the quality of the data and overall database management. All the conditions were coded using the International Classification of Diseases, 10th edition (ICD-10). This retrospective study included eight years of data, from 1 January 2012 to 31 December 2019, and the information was available on 6755 patients.

### **Study population and study inclusion and exclusion criteria**

Adult patients ( $\geq 18$  years) with T2DM were included. If a patient was admitted more than once during the study period, data pertinent to the last admission were extracted to obtain the most recent information on health conditions. Individuals with gestational diabetes, type 1 diabetes, secondary diabetes, and unknown types of diabetes were excluded.

### **Study variables**

We extracted and categorised the following information from the database:

- age (18–39 years, 40–59 years, 60–69 years or  $\geq 70$  years),
- sex (male or female),
- education (university/college, class 7–12, class 1–6, or no qualification),

- occupation (manual worker [i.e., more physical work than mental work], non-manual worker [i.e., more mental work than physical work], or never worked/retired),
- marital status (married or single/divorced/widowed),
- residence (urban or rural using the “hukou” system i.e., the Chinese household registration system),
- health insurance,
- smoking (current status),
- alcohol consumption (current status),
- duration of T2DM ( $\leq$  1 year, > 1–5 years, > 5–10 years, or > 10 years), and
- blood glucose level (glycated haemoglobin [HbA1c < 7% (good) or  $\geq$  7% (poor)], estimated using the high-performance liquid chromatographic method and D-10 Haemoglobin Analyser [Bio-Rad, USA]). In China, the recommended HbA1c treatment target did not change over the study period (< 7% for most patients with T2DM).[19-21]

In addition, information on comorbidities was extracted. The index condition was T2DM. Comorbidity was defined as the co-existence of at least one other chronic condition, i.e., either a physical non-communicable disease (duration  $\geq$  3 months), a mental health condition (duration  $\geq$  3 months), or an infectious disease (duration  $\geq$  3 months).[5-7] T2DM-specific complications (i.e., microvascular complications, such as diabetic retinopathy, nephropathy, and neuropathy/foot) were excluded as these were consequences of the index condition; hence, they were not considered as comorbidities.[6]

## **Ethics**

The Research Ethics Committee of the Ningbo First Hospital, China, approved this study (2020-R106). The researchers had no access to information that could identify individual patients during the data analyses. No informed consent was required as per

1  
2  
3  
4 research ethics rules.  
5  
6

### 7 **Patient and public involvement**

8 Patients and public were not involved in the study.  
9  
10  
11

### 12 **Statistical analyses**

13 We calculated numbers and percentages for categorical variables, and means and  
14 standard deviations (SDs) for normally distributed continuous variables. We used a  
15 simple logistic regression method to investigate the association between the different  
16 variables and comorbidities. We developed a multiple logistic regression model to  
17 identify any independent associations. For this, we used backward stepwise  
18 regression analysis and included all the variables. Additionally, we performed a  
19 sensitivity analysis — in the multiple logistic regression model, we included only those  
20 variables that had a p-value  $\leq 0.20$  in simple logistic regressions. We calculated odds  
21 ratios (ORs) and 95% confidence intervals (CIs). We used IBM SPSS Statistics version  
22 26.0 for Windows for statistical analyses.  
23  
24  
25  
26  
27  
28  
29  
30  
31  
32  
33  
34  
35  
36

### 37 **RESULTS**

38 A total of 4777 patients with T2DM satisfied the eligibility criteria. The mean ( $\pm$ SD) age  
39 of patients was 64.2 ( $\pm$ 14.2) years, and approximately 52% (n=2482) of them were  
40 men. The mean ( $\pm$ SD) HbA1c level was 9.2% ( $\pm$ 2.4%). Over eight years, the  
41 prevalence of comorbidities was 93.7%. The year-wise prevalences from 2012 to 2019  
42 were 96.9%, 95.0%, 92.9%, 95.5%, 93.2%, 91.5%, 94.0%, and 93.6%, respectively.  
43  
44  
45  
46  
47  
48  
49  
50

51 Figure 1 shows the number of comorbidities in our study. The mean ( $\pm$ SD) number of  
52 comorbidities was 3 ( $\pm$ 1). Figure 2 shows the number of comorbidities in our study in  
53 the different age groups. In the  $\geq 70$  years age group, 68.5% (1247) had  $\geq 3$   
54 comorbidities, whereas the prevalences were only 33.1% (102), 43.5% (592), and 55.5%  
55 (715) in the 18–39, 40–59, and 60–69 years age groups, respectively. Table 1 reports  
56  
57  
58  
59  
60



1  
2  
3  
4 the most common comorbidities in our study. Essential hypertension (49.4%),  
5 disorders of lipoprotein metabolism and other lipidaemias (33.7%), nontoxic thyroid  
6 nodule (22.8%), fatty change of liver (20.6%), and cataract (10.7%) were the five most  
7 prevalent comorbidities.  
8  
9  
10

11  
12  
13 Table 2 reports the characteristics of the study participants. We found that the  
14 comorbidities were associated with age, sex, education, occupation, marital status,  
15 residence, health insurance, and the duration of T2DM. Table 3 reports the multiple  
16 backward stepwise logistic regression analysis for determining factors independently  
17 associated with the comorbidities. The odds of comorbidities increased with the age of  
18 patients (18–39 years: 1; 40–59 years: OR 2.80, 95% CI 1.98–3.96; 60–69 years: 4.43,  
19 3.04–6.44; and ≥70 years: 10.97, 7.17–16.77). The odds were lower in female patients  
20 (0.66, 0.51–0.84), patients residing in rural areas (0.75, 0.59–0.95), and patients  
21 without health insurance (0.62, 0.46–0.83). The odds were higher in  
22 single/divorced/widowed patients compared to married patients (1.95, 1.21–3.12). We  
23 obtained similar results in the sensitivity analysis.  
24  
25  
26  
27  
28  
29  
30  
31  
32  
33  
34  
35  
36  
37

## 38 **DISCUSSION**

39 In our tertiary care department in Ningbo, China, approximately 94% of the patients  
40 with T2DM had comorbidities and this influenced the overall management. In a  
41 previous study, we found that approximately 72% of the patients with T2DM were  
42 prescribed polypharmacy.[22] There are no similar studies on comorbidities conducted  
43 in patients with T2DM in China published in the English language. However, we found  
44 two similar studies published in Mandarin: one on patients with diabetes at a  
45 community health centre and another on outpatients with T2DM at a tertiary care  
46 hospital.[23, 24] The corresponding prevalence figures were around 95% and 73%,  
47 respectively. The different prevalence figures could be explained by the differences in  
48 population characteristics, the study setting, and the definition of comorbidity applied.  
49 Several studies have been conducted on this subject in high-income countries such as  
50  
51  
52  
53  
54  
55  
56  
57  
58  
59  
60

1  
2  
3  
4 the United States and European countries.[25-29] All these studies, and also our study,  
5 have highlighted the fact that comorbidities are highly prevalent in patients with T2DM.  
6 A systematic review and meta-analysis of the prevalence and the factors associated  
7 with comorbidities in patients with T2DM in different geographical locations will be  
8 helpful.  
9  
10  
11  
12

13  
14  
15 Comorbidities are not synonymous with complications.[6] In a previous study on the  
16 vascular complications of T2DM, we included microvascular complications (i.e.,  
17 diabetic retinopathy, nephropathy, and neuropathy/foot) and macrovascular  
18 complications (i.e., coronary heart disease, stroke, and peripheral arterial disease) and  
19 found that more than half of the patients with T2DM had vascular complications.[30] In  
20 the present study, we explored comorbidities in patients with T2DM using a  
21 recommended definition. Comorbidity was defined as the co-existence of at least one  
22 other chronic condition, either a physical (non-communicable/infectious disease) or  
23 mental health condition.[5-7] Unlike the previous study, in the present study,  
24 microvascular complications were excluded, as these were consequences of T2DM  
25 and should not be considered as comorbidities.[6]  
26  
27  
28  
29  
30  
31  
32  
33  
34  
35  
36  
37  
38

39 We found that the odds of comorbidities increased with age in patients with T2DM. Age  
40 is one of the most well-studied and consistent determinants of comorbidities.[25, 28,  
41 31] Age-related organ degeneration is a natural process and can lead to the  
42 development of many health conditions.[32] However, it should be noted that  
43 comorbidities do not correspond with age and they are not limited to the older  
44 population alone.[33] In our study, the prevalences of comorbidities were around 80%  
45 and 91% in the 18–39 and 40–59 years age groups, respectively. We found that the  
46 odds of comorbidities were lower in female patients with T2DM compared with those  
47 in their male counterparts. This finding is consistent with other studies.[25, 28] This  
48 could be due to differences at the biological level. Another potential reason could be  
49 the reporting differences in sex-specific health conditions. For example, female  
50 patients with T2DM often present with atypical symptoms of cardiovascular  
51  
52  
53  
54  
55  
56  
57  
58  
59  
60

1  
2  
3  
4 diseases.[34] Additionally, the standard non-invasive diagnostic tests perform better in  
5  
6 men than in women.[35] All these hinder the diagnosis of cardiovascular diseases in  
7  
8 women. Another example is benign prostatic hyperplasia, one of the most common  
9  
10 comorbidities in our study. This comorbidity was diagnosed because of the compulsory  
11  
12 ultrasound scan of the urinary system of patients with T2DM at our hospital for possible  
13  
14 kidney diseases. In comparison, the gynaecological examination is not a routine  
15  
16 examination in women with T2DM.

17  
18  
19 We found that the odds of comorbidities were lower in patients with T2DM residing in  
20  
21 rural areas compared to those in urban areas. This could be due to economic growth,  
22  
23 urbanisation, and its negative consequences such as an unhealthy lifestyle.[36-38]  
24  
25 The link between an unhealthy lifestyle and chronic conditions (particularly non-  
26  
27 communicable diseases) is well established.[39] A similar association has also  
28  
29 emerged with comorbidities.[23, 40] Another reason could be that rural patients in  
30  
31 China have limited access to healthcare and thus, they may undergo fewer diagnostic  
32  
33 tests and obtain fewer confirmations of health conditions.[41] We found that the odds  
34  
35 of comorbidities were lower in patients with T2DM without health insurance compared  
36  
37 to those with health insurance. This could be due to the fact that over 90% of the  
38  
39 Chinese population have some sort of health insurance,[42] and these patients may  
40  
41 undergo more diagnostic tests (within the scope of their health insurance policy) and  
42  
43 obtain confirmation of a range of health conditions.[43] We found that the odds of  
44  
45 comorbidities were higher in single/divorced/widowed patients with T2DM compared  
46  
47 with those in married patients. In general, the spouses of married patients provide both  
48  
49 physical and mental support to them, and this could help them manage their existing  
50  
51 health conditions and prevent new ones from emerging.[44,45]

52  
53  
54 This study has several strengths and weaknesses. Comorbidity is a less-explored area  
55  
56 in China, and to the best of our knowledge, this was the first study to explore  
57  
58 comorbidities in patients with T2DM in Ningbo and the broader Zhejiang Province. The  
59  
60 quality of our routinely collected data was good. Unlike other studies where

1  
2  
3  
4 comorbidities in T2DM were self-reported by the patients with T2DM using a  
5 predetermined list of selected comorbidities,[23, 24] we used a holistic approach. All  
6 the conditions were coded using the International Classification of Diseases, 10th  
7 edition (ICD-10) in our database, and we included all the chronic conditions in our  
8 study. This also minimised the possibility of recall bias in our study. Our study had  
9 extremely low missing data; only HbA1c data were missing in 130 patients out of 4777  
10 (i.e., 2.7%). Multiple logistic regression analysis included a sample with missing data  
11 for the adjusted variable. Since it was a cross-sectional study, the causal relationship  
12 between variables and comorbidities could not be determined. We propose to conduct  
13 a longitudinal study to explore the effects of various factors on comorbidities, including  
14 factors considered in this study and other factors such as physical activity and diet that  
15 were not present in our database and could not be adjusted for in the models. In our  
16 study, the high prevalence of comorbidities could be due to the study setting (i.e.,  
17 hospital). The findings of our hospital-based study could be valid in similar settings.  
18 We suggest conducting a population-based study that might provide a distinct picture  
19 of the issue in Ningbo.  
20  
21  
22  
23  
24  
25  
26  
27  
28  
29  
30  
31  
32  
33  
34  
35  
36

37 In conclusion, we found that a large percentage of patients with T2DM in the tertiary  
38 care department in Ningbo, China, had comorbidities, and we also identified the factors  
39 associated with comorbidities. The findings could be used in developing, evaluating,  
40 and implementing interventions aimed at improving outcomes in patients with T2DM  
41 with comorbidities.  
42  
43  
44  
45  
46  
47

48 **ACKNOWLEDGEMENTS** The authors thank the patients and Yida Li for the  
49 management and organisation of the original data.  
50  
51  
52  
53

54 **CONTRIBUTORS** JL and KC designed the study. XL and KC analysed the data and  
55 wrote the first draft of the manuscript. SX and YC contributed to patient registration  
56 and data entry. XL contributed to data cleaning. XL, KC, SX, YC, MX, LL and JL revised  
57 it critically for important intellectual content and approved the final version.  
58  
59  
60

1  
2  
3  
4  
5  
6 **FUNDING** The work was supported by the Medical Health Science and Technology  
7 Project of Zhejiang Province (Grant No. 2019KY562) and the Major Program of Social  
8 Development of Ningbo Science and Technology Bureau (Grant No. 2019C50094).  
9

10  
11  
12  
13 **COMPETING INTERESTS** None declared.  
14

15  
16  
17 **ETHICS APPROVAL** The Research Ethics Committee of Ningbo First Hospital, China  
18 approved the study (2020-R106).  
19

20  
21  
22  
23 **DATA SHARING STATEMENT** The dataset will be available upon request unless  
24 there are legal or ethical reasons for not doing so.  
25

## 26 27 28 **REFERENCES**

- 29 1. Ningbo Municipal Statistics Bureau. Statistical Bulletin on National Economic and  
30 Social Development in Ningbo, China, 2018.  
31
- 32 2. Health and Family Planning Commission of Ningbo Municipality. Prevention and  
33 treatment of chronic diseases in Ningbo.  
34 <http://www.cnnb.com.cn/nbzfxwfbh/system/2014/05/22/008068694.shtml> (accessed  
35 25 Apr 2020).  
36
- 37 3. Yao DZ, Sun XH, Li JH. Prevalence and risk factors of diabetes in people over 40  
38 years of age in Ningbo city area. *Modern Practical Medicine* 2016;28:1343-5.  
39
- 40 4. Li H, Cui J, Gong J, *et al*. Diabetes morbidity and mortality of residents in Ningbo,  
41 2010-2014. *Chinese Rural Health Service Administration* 2016;36:1304-7.  
42
- 43 5. World Health Organization. *Multimorbidity*. Geneva: Switzerland, 2016.  
44
- 45 6. Ording AG, Sørensen HT. Concepts of comorbidities, multiple morbidities,  
46 complications, and their clinical epidemiologic analogs. *Clin Epidemiol* 2013;5:199-203.  
47
- 48 7. Valderas JM, Starfield B, Sibbald B, *et al*. Defining comorbidity: implications for  
49 understanding health and health services. *Ann Fam Med* 2009;7:357-63.  
50
- 51 8. Einarson TR, Acs A, Ludwig C, *et al*. Prevalence of cardiovascular disease in type  
52 2 diabetes: a systematic literature review of scientific evidence from across the world  
53  
54  
55  
56  
57  
58  
59  
60

1  
2  
3 in 2007-2017. *Cardiovasc Diabetol* 2018;17:83.  
4

5  
6 9. Nouwen A, Winkley K, Twisk J, *et al*. Type 2 diabetes mellitus as a risk factor for the  
7 onset of depression: a systematic review and meta-analysis. *Diabetologia*  
8 2010;53:2480-6.  
9

10  
11 10. Yokomichi H, Nagai A, Hirata M, *et al*. Survival of macrovascular disease, chronic  
12 kidney disease, chronic respiratory disease, cancer and smoking in patients with type  
13 2 diabetes: BioBank Japan cohort. *J Epidemiol* 2017;27:S98-S106.  
14

15  
16 11. Adriaanse MC, Drewes HW, van der Heide I, *et al*. The impact of comorbid chronic  
17 conditions on quality of life in type 2 diabetes patients. *Qual Life Res* 2016;25:175-82.  
18

19  
20 12. Wermeling PR, Gorter KJ, van Stel HF, *et al*. Both cardiovascular and non-  
21 cardiovascular comorbidity are related to health status in well-controlled type 2  
22 diabetes patients: a cross-sectional analysis. *Cardiovasc Diabetol* 2012;11:121.  
23

24  
25 13. Gruneir A, Markle-Reid M, Fisher K, *et al*. Comorbidity burden and health services  
26 use in community-living older adults with diabetes mellitus: a retrospective cohort study.  
27 *Can J Diabetes* 2016;40:35-42.  
28

29  
30 14. Terauchi Y, Ozaki A, Zhao XH, *et al*. Humanistic and economic burden of  
31 cardiovascular disease related comorbidities and hypoglycaemia among patients with  
32 type 2 diabetes in Japan. *Diabetes Res Clin Pract* 2019;149:115-25.  
33

34  
35 15. Australian Bureau of Statistics. *National Health Survey: First Result, 2014-15*.  
36 Canberra: Australian, 2015.  
37

38  
39 16. Druss BG, Marcus SC, Olfson M, *et al*. Comparing the national economic burden  
40 of five chronic conditions. *Health Aff (Millwood)* 2001;20:233-41.  
41

42  
43 17. Ningbo First Hospital. Hospital Introduction.  
44 <http://www.nbdyyy.com/col/col100/index.html> (accessed 25 Apr 2020).  
45

46  
47 18. Ministry of Health of the People's Republic of China. *The measures for the*  
48 *administration of the hospital grade*. Beijing: Ministry of Health of the People's  
49 Republic of China, 1989.  
50

51  
52 19. Chinese Diabetes Society. China guideline for type 2 diabetes (2010 ed). *Chin J*  
53 *Diabetes* 2012;20:S1-S36.  
54

55  
56 20. Chinese Diabetes Society. China guideline for type 2 diabetes (2013 ed). *Chin J*  
57 *Endocrinol Metab* 2014;30:893-942.  
58  
59  
60

21. Jia W, Weng J, Zhu D, *et al.* Standards of medical care for type 2 diabetes in China 2019. *Diabetes Metab Res Rev* 2019;35:e3158.
22. Li J, Chattopadhyay K, Xu M, *et al.* Prevalence and predictors of polypharmacy prescription among type 2 diabetes patients at a tertiary care department in Ningbo, China: a retrospective database study. *PLoS One* 2019;14:e0220047.
23. Xing Y, Wang P, Yang X. A survey of comorbidity and health behaviors of diabetic patients in an area of Beijing. *Journal of Chinese Physician* 2020;22:379-84.
24. Zhao W, Zhao D, Wang X, *et al.* Current status and influential factors of comorbidity for patients with type 2 diabetes mellitus in Tongzhou district of Beijing. *Chin J Health Manage* 2019;13:541-5.
25. Alonso-Morán E, Orueta JF, Esteban JI, *et al.* Multimorbidity in people with type 2 diabetes in the Basque country (Spain): prevalence, comorbidity clusters and comparison with other chronic patients. *Eur J Intern Med* 2015;26:197-202.
26. Lin PJ, Kent DM, Winn A, *et al.* Multiple chronic conditions in type 2 diabetes mellitus: prevalence and consequences. *Am J Manag Care* 2015;21:e23-34.
27. Teljeur C, Smith SM, Paul G, *et al.* Multimorbidity in a cohort of patients with type 2 diabetes. *Eur J Gen Pract* 2013;19:17-22.
28. Iglay K, Hannachi H, Howie PJ, *et al.* Prevalence and co-prevalence of comorbidities among patients with type 2 diabetes mellitus. *Curr Med Res Opin* 2016;32:1243-52.
29. Hermans MP, Dath N. Prevalence and co-prevalence of comorbidities in Belgian patients with type 2 diabetes mellitus: a transversal, descriptive study. *Acta Clin Belg* 2018;73:68-74.
30. Li J, Chattopadhyay K, Xu M, *et al.* Prevalence and associated factors of vascular complications among inpatients with type 2 diabetes: a retrospective database study at a tertiary care department, Ningbo, China. *PLoS One* 2020;15:e0235161.
31. Mata-Cases M, Franch-Nadal J, Real J, *et al.* Prevalence and coprevalence of chronic comorbid conditions in patients with type 2 diabetes in Catalonia: a population-based cross-sectional study. *BMJ Open* 2019;9:e031281.
32. King M, Lipsky MS. Clinical implications of aging. *Dis Mon* 2015;61:467-74.
33. van Oostrom SH, Gijzen R, Stirbu I, *et al.* Time trends in prevalence of chronic diseases and multimorbidity not only due to aging: data from general practices and

1  
2  
3 health surveys. *PLoS One* 2016;11:e0160264.

4  
5  
6 34. Wada H, Miyauchi K, Daida H. Gender Differences in the clinical features and  
7 outcomes of patients with coronary artery disease. *Expert Rev Cardiovasc Ther*  
8 2019;17:127-33.

9  
10  
11 35. Shah AS, Griffiths M, Lee KK, *et al*. High sensitivity cardiac troponin and the under-  
12 diagnosis of myocardial infarction in women: prospective cohort study. *BMJ*  
13 2015;350:g7873.

14  
15  
16 36. Zhu W, Chi A, Sun Y. Physical activity among older Chinese adults living in urban  
17 and rural areas: a review. *J Sport Health Sci* 2016;5:281-6.

18  
19  
20 37. Muntner P, Gu D, Wildman RP, *et al*. Prevalence of physical activity among  
21 Chinese adults: results from the international collaborative study of cardiovascular  
22 disease in Asia. *Am J Public Health* 2005;95:1631-6.

23  
24  
25 38. Miao J, Wu X. Urbanization, socioeconomic status and health disparity in China.  
26 *Health Place* 2016;42:87-95.

27  
28  
29 39. World Health Organization. *Global action plan for the prevention and control of*  
30 *NCD 2013-2020*. Geneva: Switzerland, 2013.

31  
32  
33 40. Wang X, Chen J, Liu X, *et al*. Identifying patterns of lifestyle behaviors among  
34 people with type 2 diabetes in Tianjin, China: a latent class analysis. *Diabetes Ther*  
35 2017;8:1379-92.

36  
37  
38 41. Liu Z, Albanese E, Li S, *et al*. Chronic disease prevalence and care among the  
39 elderly in urban and rural Beijing, China - a 10/66 dementia research group cross-  
40 sectional survey. *BMC Public Health* 2009;9:394.

41  
42  
43 42. Zhao C, Wang C, Shen C, *et al*. China's achievements and challenges in improving  
44 health insurance coverage. *Drug Discov Ther* 2018;12:1-6.

45  
46  
47 43. Yang C, Huang Z, Sun K, *et al*. Comparing the economic burden of type 2 diabetes  
48 mellitus patients with and without medical insurance: a cross-sectional study in China.  
49 *Med Sci Monit* 2018;24:3039-102.

50  
51  
52 44. Stroebe M, Schut H, Stroebe W. Health outcomes of bereavement. *Lancet* 2007;  
53 370:1960-73.

54  
55  
56 45. Parajuli J, Saleh F, Thapa N, Ali L. Factors associated with nonadherence to diet  
57 and physical activity among Nepalese type 2 diabetes patients: a cross sectional study.  
58 *BMC Res Notes* 2014;7:758.  
59  
60



Figure 1. Number of comorbidities in our study.

Figure 2. Number of comorbidities in our study in the different age groups.

Table 1. Most common comorbidities in our study.

| Most common comorbidities (based on ICD-10 classification)                   | Patients with T2DM n (%) |
|------------------------------------------------------------------------------|--------------------------|
| Essential hypertension (I10)                                                 | 2362 (49.4)              |
| Disorders of lipoprotein metabolism and other lipidaemias (E78)              | 1612 (33.7)              |
| Nontoxic thyroid nodule (E04)                                                | 1088 (22.8)              |
| Fatty (change of) liver (K76)                                                | 984 (20.6)               |
| Cataract (H26)                                                               | 512 (10.7)               |
| Chronic ischemic heart disease (I25)                                         | 455 (9.5)                |
| Atherosclerosis (I70)                                                        | 411 (8.6)                |
| Osteoporosis (M81)                                                           | 348 (7.3)                |
| Cerebral infarction (I63)                                                    | 341 (7.1)                |
| Benign prostatic hyperplasia (N40)                                           | 303 (12.2*)              |
| Abnormal findings on diagnostic imaging of lung (R91)                        | 287 (6.0)                |
| Thoracic, thoracolumbar, and lumbosacral intervertebral disc disorders (M51) | 260 (5.4)                |
| Obesity (E66)                                                                | 177 (3.7)                |
| Cervical disc disorders (M50)                                                | 161 (3.4)                |
| Chronic viral hepatitis (B18)                                                | 138 (2.9)                |
| Sleep disorders (G47)                                                        | 135 (2.8)                |
| Gout (M10)                                                                   | 132 (2.8)                |
| Disorders of purine and pyrimidine metabolism (E79)                          | 127 (2.7)                |
| Atrial fibrillation and flutter (I48)                                        | 118 (2.5)                |
| Gastro-oesophageal reflux disease (K21)                                      | 111 (2.3)                |

\*In 2482 males.

Table 2. Characteristics of the study participants.

|                                             | Total<br>(4777) | Comorbidity<br>No (299)<br>n (%) | Comorbidity<br>Yes (4478)<br>n (%) | Unadjusted OR<br>(95% CI) | P value |
|---------------------------------------------|-----------------|----------------------------------|------------------------------------|---------------------------|---------|
| <b>Age (years)</b>                          |                 |                                  |                                    |                           | <0.001  |
| 18-39                                       | 308             | 63 (20.5)                        | 245 (79.5)                         | 1                         |         |
| 40-59                                       | 1360            | 120 (8.8)                        | 1240 (91.2)                        | 2.66 (1.90,3.71)          |         |
| 60-69                                       | 1289            | 75 (5.8)                         | 1214 (94.2)                        | 4.16 (2.90,5.98)          |         |
| ≥70                                         | 1820            | 41 (2.3)                         | 1779 (97.7)                        | 11.16 (7.37,16.90)        |         |
| <b>Sex</b>                                  |                 |                                  |                                    |                           | 0.008   |
| Male                                        | 2482            | 133 (5.4)                        | 2349 (94.6)                        | 1                         |         |
| Female                                      | 2295            | 166 (7.2)                        | 2129 (92.8)                        | 0.73 (0.57,0.92)          |         |
| <b>Education</b>                            |                 |                                  |                                    |                           | 0.005   |
| University/college                          | 545             | 47 (8.6)                         | 498 (91.4)                         | 1                         |         |
| Class 7-12                                  | 1927            | 136 (7.1)                        | 1791 (92.9)                        | 1.24 (0.88,1.76)          |         |
| Class 1-6                                   | 1574            | 80 (5.1)                         | 1494 (94.9)                        | 1.76 (1.21,2.56)          |         |
| No qualification                            | 731             | 36 (4.9)                         | 695 (95.1)                         | 1.82 (1.16,2.86)          |         |
| <b>Occupation</b>                           |                 |                                  |                                    |                           | <0.001  |
| Manual worker                               | 1088            | 74 (6.8)                         | 1014 (93.2)                        | 1                         |         |
| Non-manual worker                           | 1884            | 152 (8.1)                        | 1732 (91.9)                        | 0.83 (0.62,1.10)          |         |
| Never worked/retired                        | 1805            | 73 (4.0)                         | 1732 (96.0)                        | 1.73 (1.24,2.41)          |         |
| <b>Marital status</b>                       |                 |                                  |                                    |                           | 0.008   |
| Married                                     | 4207            | 278 (6.6)                        | 3929 (93.4)                        | 1                         |         |
| Single/divorced/widowed                     | 570             | 21 (3.7)                         | 549 (96.3)                         | 1.85 (1.18,2.91)          |         |
| <b>Residence</b>                            |                 |                                  |                                    |                           | <0.001  |
| Urban                                       | 2815            | 145 (5.2)                        | 2670 (94.8)                        | 1                         |         |
| Rural                                       | 1962            | 154 (7.8)                        | 1808 (92.2)                        | 0.64 (0.50,0.81)          |         |
| <b>Health insurance</b>                     |                 |                                  |                                    |                           | <0.001  |
| Yes                                         | 4211            | 232 (5.5)                        | 3979 (94.5)                        | 1                         |         |
| No                                          | 564             | 67 (11.9)                        | 497 (88.1)                         | 0.43 (0.33,0.58)          |         |
| <b>Smoking (current status)</b>             |                 |                                  |                                    |                           | 0.073   |
| No                                          | 3714            | 245 (6.6)                        | 3469 (93.4)                        | 1                         |         |
| Yes                                         | 1063            | 54 (5.1)                         | 1009 (94.9)                        | 1.32 (0.98,1.79)          |         |
| <b>Alcohol consumption (current status)</b> |                 |                                  |                                    |                           | 0.713   |
| No                                          | 4169            | 263 (6.3)                        | 3906 (93.7)                        | 1                         |         |
| Yes                                         | 608             | 36 (5.9)                         | 572 (94.1)                         | 1.07 (0.75,1.53)          |         |
| <b>Duration of T2DM (years)</b>             |                 |                                  |                                    |                           | <0.001  |
| ≤1                                          | 981             | 93 (9.5)                         | 888 (90.5)                         | 1                         |         |
| >1-5                                        | 880             | 60 (6.8)                         | 820 (93.2)                         | 1.43 (1.02,2.01)          |         |
| >5-10                                       | 1247            | 74 (5.9)                         | 1173 (94.1)                        | 1.66 (1.21,2.28)          |         |
| >10                                         | 1669            | 72 (4.3)                         | 1597 (95.7)                        | 2.32 (1.69,3.19)          |         |
| <b>Blood glucose level (HbA1c)</b>          |                 |                                  |                                    |                           | 0.458   |
| <7%                                         | 899             | 64 (7.1)                         | 835 (92.9)                         | 1                         |         |

|         |      |           |             |                  |  |
|---------|------|-----------|-------------|------------------|--|
| ≥7%     | 3748 | 226 (6.0) | 3522 (94.0) | 1.19 (0.90,1.59) |  |
| Unknown | 130  | 9 (6.9)   | 121 (93.1)  | 1.03 (0.50,2.12) |  |

Table 3. Multiple backward stepwise logistic regression analysis for determining factors independently associated with comorbidity.

|                         | Adjusted OR (95% CI) | P value |
|-------------------------|----------------------|---------|
| <b>Age (years)</b>      |                      | <0.001  |
| 18-39                   | 1                    |         |
| 40-59                   | 2.80 (1.98,3.96)     |         |
| 60-69                   | 4.43 (3.04,6.44)     |         |
| ≥70                     | 10.97 (7.17,16.77)   |         |
| <b>Sex</b>              |                      | <0.001  |
| Male                    | 1                    |         |
| Female                  | 0.66 (0.51,0.84)     |         |
| <b>Marital status</b>   |                      | 0.006   |
| Married                 | 1                    |         |
| Single/divorced/widowed | 1.95 (1.21,3.12)     |         |
| <b>Residence</b>        |                      | 0.018   |
| Urban                   | 1                    |         |
| Rural                   | 0.75 (0.59,0.95)     |         |
| <b>Health insurance</b> |                      | 0.002   |
| Yes                     | 1                    |         |
| No                      | 0.62 (0.46,0.83)     |         |

1  
2  
3  
4  
5  
6  
7  
8  
9  
10  
11  
12  
13  
14  
15  
16  
17  
18  
19  
20  
21  
22  
23  
24  
25  
26  
27  
28  
29  
30  
31  
32  
33  
34  
35  
36  
37  
38  
39  
40  
41  
42  
43  
44  
45  
46  
47  
48  
49  
50  
51  
52  
53  
54  
55  
56  
57  
58  
59  
60

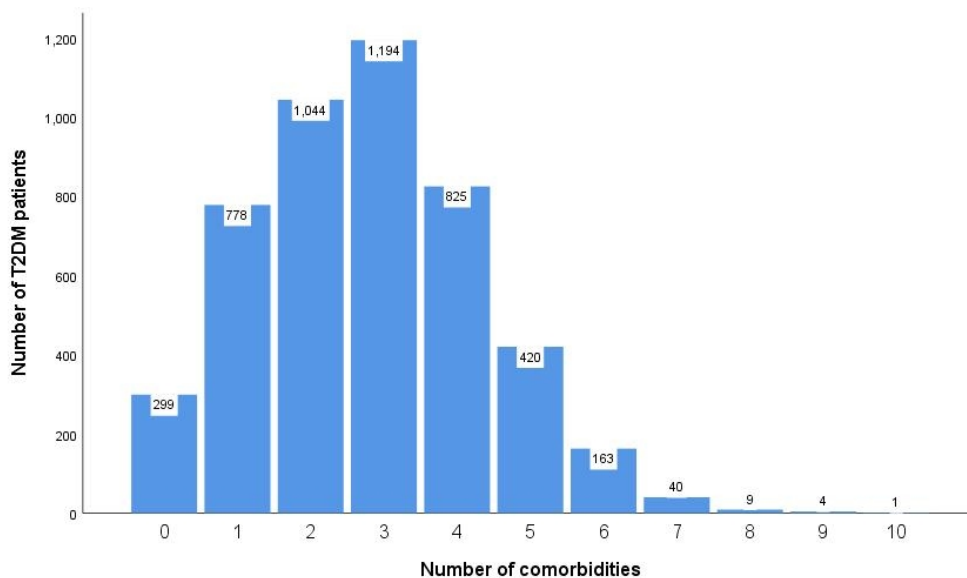

Figure 1. Number of comorbidities in our study.

300x176mm (72 x 72 DPI)

1  
2  
3  
4  
5  
6  
7  
8  
9  
10  
11  
12  
13  
14  
15  
16  
17  
18  
19  
20  
21  
22  
23  
24  
25  
26  
27  
28  
29  
30  
31  
32  
33  
34  
35  
36  
37  
38  
39  
40  
41  
42  
43  
44  
45  
46  
47  
48  
49  
50  
51  
52  
53  
54  
55  
56  
57  
58  
59  
60

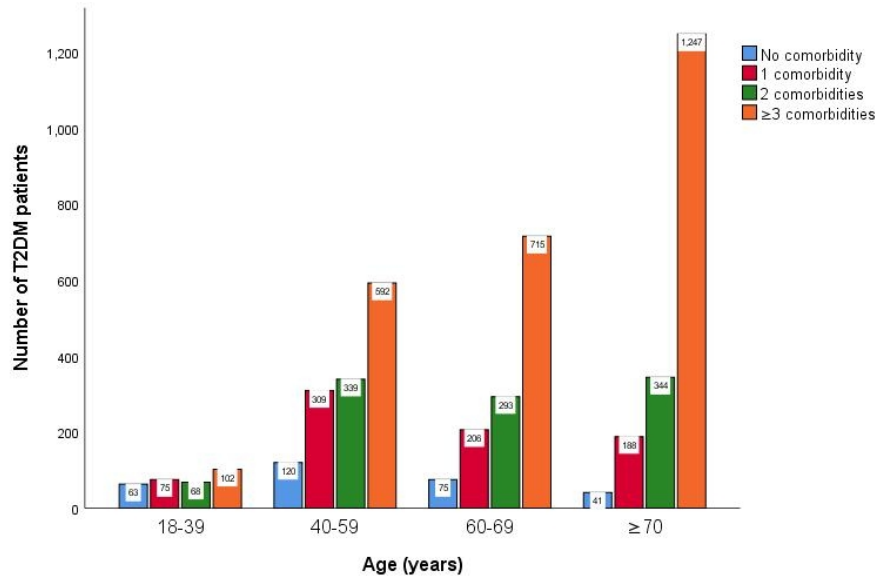

Figure 2. Number of comorbidities in our study in the different age groups.

300x176mm (72 x 72 DPI)

**STROBE 2007 (v4) Statement—Checklist of items that should be included in reports of *cross-sectional studies***

| Section/Topic                | Item # | Recommendation                                                                                                                                                                       | Reported on page # |
|------------------------------|--------|--------------------------------------------------------------------------------------------------------------------------------------------------------------------------------------|--------------------|
| <b>Title and abstract</b>    | 1      | (a) Indicate the study's design with a commonly used term in the title or the abstract                                                                                               | 1,2                |
|                              |        | (b) Provide in the abstract an informative and balanced summary of what was done and what was found                                                                                  | 2,3                |
| <b>Introduction</b>          |        |                                                                                                                                                                                      |                    |
| Background/rationale         | 2      | Explain the scientific background and rationale for the investigation being reported                                                                                                 | 4                  |
| Objectives                   | 3      | State specific objectives, including any prespecified hypotheses                                                                                                                     | 4                  |
| <b>Methods</b>               |        |                                                                                                                                                                                      |                    |
| Study design                 | 4      | Present key elements of study design early in the paper                                                                                                                              | 5                  |
| Setting                      | 5      | Describe the setting, locations, and relevant dates, including periods of recruitment, exposure, follow-up, and data collection                                                      | 5                  |
| Participants                 | 6      | (a) Give the eligibility criteria, and the sources and methods of selection of participants                                                                                          | 5                  |
| Variables                    | 7      | Clearly define all outcomes, exposures, predictors, potential confounders, and effect modifiers. Give diagnostic criteria, if applicable                                             | 5,6                |
| Data sources/<br>measurement | 8*     | For each variable of interest, give sources of data and details of methods of assessment (measurement). Describe comparability of assessment methods if there is more than one group | 5,6                |
| Bias                         | 9      | Describe any efforts to address potential sources of bias                                                                                                                            | 5,6                |
| Study size                   | 10     | Explain how the study size was arrived at                                                                                                                                            | 5                  |
| Quantitative variables       | 11     | Explain how quantitative variables were handled in the analyses. If applicable, describe which groupings were chosen and why                                                         | 5,6,7              |
| Statistical methods          | 12     | (a) Describe all statistical methods, including those used to control for confounding                                                                                                | 7                  |
|                              |        | (b) Describe any methods used to examine subgroups and interactions                                                                                                                  | n/a                |
|                              |        | (c) Explain how missing data were addressed                                                                                                                                          | 7, Table2          |
|                              |        | (d) If applicable, describe analytical methods taking account of sampling strategy                                                                                                   | n/a                |
|                              |        | (e) Describe any sensitivity analyses                                                                                                                                                | 7                  |
| <b>Results</b>               |        |                                                                                                                                                                                      |                    |

|                          |     |                                                                                                                                                                                                              |                                       |
|--------------------------|-----|--------------------------------------------------------------------------------------------------------------------------------------------------------------------------------------------------------------|---------------------------------------|
| Participants             | 13* | (a) Report numbers of individuals at each stage of study—eg numbers potentially eligible, examined for eligibility, confirmed eligible, included in the study, completing follow-up, and analysed            | 5,7                                   |
|                          |     | (b) Give reasons for non-participation at each stage                                                                                                                                                         | n/a                                   |
|                          |     | (c) Consider use of a flow diagram                                                                                                                                                                           | n/a                                   |
| Descriptive data         | 14* | (a) Give characteristics of study participants (eg demographic, clinical, social) and information on exposures and potential confounders                                                                     | 7, Table2                             |
|                          |     | (b) Indicate number of participants with missing data for each variable of interest                                                                                                                          | Table2                                |
| Outcome data             | 15* | Report numbers of outcome events or summary measures                                                                                                                                                         | 7, Figure 1, Figure 2, Table1, Table2 |
| Main results             | 16  | (a) Give unadjusted estimates and, if applicable, confounder-adjusted estimates and their precision (eg, 95% confidence interval). Make clear which confounders were adjusted for and why they were included | 7, 8, Table2                          |
|                          |     | (b) Report category boundaries when continuous variables were categorized                                                                                                                                    | 7, 8, Table2, Table3                  |
|                          |     | (c) If relevant, consider translating estimates of relative risk into absolute risk for a meaningful time period                                                                                             | n/a                                   |
| Other analyses           | 17  | Report other analyses done—eg analyses of subgroups and interactions, and sensitivity analyses                                                                                                               | 7, 8                                  |
| <b>Discussion</b>        |     |                                                                                                                                                                                                              |                                       |
| Key results              | 18  | Summarise key results with reference to study objectives                                                                                                                                                     | 8, 9, 10, 11                          |
| Limitations              | 19  | Discuss limitations of the study, taking into account sources of potential bias or imprecision. Discuss both direction and magnitude of any potential bias                                                   | 10, 11                                |
| Interpretation           | 20  | Give a cautious overall interpretation of results considering objectives, limitations, multiplicity of analyses, results from similar studies, and other relevant evidence                                   | 8, 9, 10, 11                          |
| Generalisability         | 21  | Discuss the generalisability (external validity) of the study results                                                                                                                                        | 11                                    |
| <b>Other information</b> |     |                                                                                                                                                                                                              |                                       |
| Funding                  | 22  | Give the source of funding and the role of the funders for the present study and, if applicable, for the original study on which the present article is based                                                | 11                                    |

\*Give information separately for cases and controls in case-control studies and, if applicable, for exposed and unexposed groups in cohort and cross-sectional studies.

**Note:** An Explanation and Elaboration article discusses each checklist item and gives methodological background and published examples of transparent reporting. The STROBE checklist is best used in conjunction with this article (freely available on the Web sites of PLoS Medicine at <http://www.plosmedicine.org/>, Annals of Internal Medicine at <http://www.annals.org/>, and Epidemiology at <http://www.epidem.com/>). Information on the STROBE Initiative is available at [www.strobe-statement.org](http://www.strobe-statement.org).

# BMJ Open

## Prevalence of comorbidities and their associated factors in patients with type 2 diabetes at a tertiary care department in Ningbo, China: a cross-sectional study

|                                 |                                                                                                                                                                                                                                                                                                                                                                                                                                                                                                                                                                                                                                                                                     |
|---------------------------------|-------------------------------------------------------------------------------------------------------------------------------------------------------------------------------------------------------------------------------------------------------------------------------------------------------------------------------------------------------------------------------------------------------------------------------------------------------------------------------------------------------------------------------------------------------------------------------------------------------------------------------------------------------------------------------------|
| Journal:                        | <i>BMJ Open</i>                                                                                                                                                                                                                                                                                                                                                                                                                                                                                                                                                                                                                                                                     |
| Manuscript ID                   | bmjopen-2020-040532.R2                                                                                                                                                                                                                                                                                                                                                                                                                                                                                                                                                                                                                                                              |
| Article Type:                   | Original research                                                                                                                                                                                                                                                                                                                                                                                                                                                                                                                                                                                                                                                                   |
| Date Submitted by the Author:   | 25-Nov-2020                                                                                                                                                                                                                                                                                                                                                                                                                                                                                                                                                                                                                                                                         |
| Complete List of Authors:       | Li, Xueyu; Ningbo University Medical School; Ningbo City First Hospital, Department of Endocrinology and Metabolism<br>Chattopadhyay, Kaushik; University of Nottingham Division of Epidemiology and Public Health, School of Medicine<br>Xu, Shengnan; Ningbo City First Hospital, Department of Endocrinology and Metabolism<br>Chen, Yanshu; Ningbo City First Hospital, Department of Endocrinology and Metabolism<br>Xu, Miao; Ningbo City First Hospital, Department of Endocrinology and Metabolism<br>Li, Li; Ningbo City First Hospital, Department of Endocrinology and Metabolism;<br>Li, Jialin; Ningbo City First Hospital, Department of Endocrinology and Metabolism |
| <b>Primary Subject Heading</b>: | Diabetes and endocrinology                                                                                                                                                                                                                                                                                                                                                                                                                                                                                                                                                                                                                                                          |
| Secondary Subject Heading:      | Diabetes and endocrinology                                                                                                                                                                                                                                                                                                                                                                                                                                                                                                                                                                                                                                                          |
| Keywords:                       | General diabetes < DIABETES & ENDOCRINOLOGY, PUBLIC HEALTH, HEALTH SERVICES ADMINISTRATION & MANAGEMENT                                                                                                                                                                                                                                                                                                                                                                                                                                                                                                                                                                             |
|                                 |                                                                                                                                                                                                                                                                                                                                                                                                                                                                                                                                                                                                                                                                                     |

SCHOLARONE™  
Manuscripts





I, the Submitting Author has the right to grant and does grant on behalf of all authors of the Work (as defined in the below author licence), an exclusive licence and/or a non-exclusive licence for contributions from authors who are: i) UK Crown employees; ii) where BMJ has agreed a CC-BY licence shall apply, and/or iii) in accordance with the terms applicable for US Federal Government officers or employees acting as part of their official duties; on a worldwide, perpetual, irrevocable, royalty-free basis to BMJ Publishing Group Ltd ("BMJ") its licensees and where the relevant Journal is co-owned by BMJ to the co-owners of the Journal, to publish the Work in this journal and any other BMJ products and to exploit all rights, as set out in our [licence](#).

The Submitting Author accepts and understands that any supply made under these terms is made by BMJ to the Submitting Author unless you are acting as an employee on behalf of your employer or a postgraduate student of an affiliated institution which is paying any applicable article publishing charge ("APC") for Open Access articles. Where the Submitting Author wishes to make the Work available on an Open Access basis (and intends to pay the relevant APC), the terms of reuse of such Open Access shall be governed by a Creative Commons licence – details of these licences and which [Creative Commons](#) licence will apply to this Work are set out in our licence referred to above.

Other than as permitted in any relevant BMJ Author's Self Archiving Policies, I confirm this Work has not been accepted for publication elsewhere, is not being considered for publication elsewhere and does not duplicate material already published. I confirm all authors consent to publication of this Work and authorise the granting of this licence.

**Title**

Prevalence of comorbidities and their associated factors in patients with type 2 diabetes at a tertiary care department in Ningbo, China: a cross-sectional study

Xueyu Li\*<sup>1, 2</sup>, Kaushik Chattopadhyay\*<sup>3</sup>, Shengnan Xu<sup>2</sup>, Yanshu Chen<sup>2</sup>, Miao Xu<sup>2</sup>, Li Li<sup>2</sup>, Jialin Li<sup>2</sup>

<sup>1</sup>Ningbo University Medical School, Ningbo, PR China

<sup>2</sup>Department of Endocrinology and Metabolism, Ningbo First Hospital, Ningbo, PR China

<sup>3</sup>Division of Epidemiology and Public Health, School of Medicine, University of Nottingham, Nottingham, UK

\*These authors contributed equally to this work.

Corresponding author: Dr Jialin Li, e-mail; [lijialin@sina.com](mailto:lijialin@sina.com)

## Abstract

**Objectives** To determine the prevalence of comorbidities in patients with type 2 diabetes (T2DM) and identify the factors independently associated with comorbidities in a tertiary care department in Ningbo, China.

**Design** A computerised medical records database was used to conduct a cross-sectional study.

**Setting** The study was conducted in a tertiary care department in Ningbo, China.

**Participants** The study was conducted on adult patients with T2DM, and it included eight years of data, from 1 January 2012 to 31 December 2019.

**The primary outcome measure** Comorbidity was defined as the co-existence of at least one other chronic condition, i.e., either a physical non-communicable disease (duration  $\geq 3$  months), a mental health condition (duration  $\geq 3$  months), or an infectious disease (duration  $\geq 3$  months).

**Results** In total, 4777 patients with T2DM satisfied the eligibility criteria. Over eight years, the prevalence of comorbidities was 93.7%. The odds of comorbidities increased with the age of patients (18–39 years: 1; 40–59 years: odds ratio 2.80, 95% confidence interval 1.98–3.96; 60–69 years: 4.43, 3.04–6.44; and  $\geq 70$  years: 10.97, 7.17–16.77). The odds were lower in female patients (0.66, 0.51–0.84), patients residing in rural areas (0.75, 0.59–0.95), and patients without health insurance (0.62, 0.46–0.83). The odds were higher in single/divorced/widowed patients compared to those in married patients (1.95, 1.21–3.12).

**Conclusions** A large percentage of patients with T2DM in the tertiary care department in Ningbo, China, had comorbidities, and the factors associated with comorbidities were identified. The findings could be used in developing, evaluating, and

1  
2  
3  
4 implementing interventions aimed at improving outcomes in patients with T2DM with  
5 comorbidities.  
6

7  
8 **Keywords**

9 comorbidity, type 2 diabetes, China  
10  
11  
12

13 **Strengths and limitations of the study**

- 14  
15  
16  
17  
18  
19  
20  
21  
22  
23  
24  
25  
26  
27  
28  
29  
30  
31  
32  
33  
34  
35  
36  
37  
38  
39  
40  
41  
42  
43  
44  
45  
46  
47  
48  
49  
50  
51  
52  
53  
54  
55  
56  
57  
58  
59  
60
- Ours was the first study to investigate comorbidities in patients with type 2 diabetes in Ningbo and the broader Zhejiang Province of China.
  - We included all the chronic conditions in our study; they were coded using the International Classification of Diseases, 10th edition (ICD-10) in our database.
  - Our study had extremely low missing data and the multiple logistic regression analysis included a sample with missing data for the adjusted variable.
  - As it was a cross-sectional study, the causal relationship between the variables and the comorbidities could not be determined.
  - The high prevalence of comorbidities in our study could be due to the study setting (i.e., hospital).

## INTRODUCTION

Ningbo is an economically developed Chinese city in Zhejiang Province. The population of the city is approximately 8.2 million.[1] Non-communicable diseases are prevalent in the city, and one of the most prevalent non-communicable diseases is type 2 diabetes (T2DM), a complex metabolic disorder.[2] China has the largest T2DM epidemic in the world, and in Ningbo, its prevalence in adults  $\geq 40$  years of age is 21%.[3] In Ningbo, the diabetes-related mortality is 14.5 per 100,000 population.[4]

There is no international consensus regarding the best way to define comorbidity. It is usually defined as the co-existence of other conditions with an index condition (i.e., the main condition under study) where these other conditions are not consequences of the index condition.[5-7] Comorbidities accelerate the progression of individual conditions, encourage the development of other physical and mental conditions, and even lead to premature mortality.[8-10] Moreover, they negatively affect overall health, wellbeing, and functioning.[11, 12] Additionally, they lead to high treatment burden, high healthcare utilisation and expenditure, and loss of economic output.[13, 14] In real life, T2DM is rarely presented in isolation and is always accompanied by comorbidity.[15, 16]

To date, no study has been undertaken to investigate comorbidities in patients with T2DM in Ningbo. The study objectives were to determine the prevalence of comorbidities in patients with T2DM and identify the factors independently associated with comorbidities. This knowledge could be used in developing, evaluating, and implementing interventions aimed at improving outcomes in patients with T2DM with comorbidities.

## METHODS

### Study location, study design, data source, and study period

1  
2  
3  
4 We conducted the study in a tertiary care department, the Department of  
5 Endocrinology and Metabolism, Ningbo First Hospital, in Ningbo, China. This tertiary  
6 care hospital delivers speciality healthcare services, provides medical education, and  
7 conducts research.[17,18] Locals and people from the surrounding areas visit this  
8 hospital as no referral is required from the general practitioner.[17] An existing  
9 computerised medical records database was used for conducting this cross-sectional  
10 study. This database contained information on all inpatients. Since it was a real-time  
11 database, new patients were added continuously. Data were entered by the medico-  
12 nursing team and an independent group of the hospital staff was responsible for  
13 assessing the quality of the data and overall database management. All the conditions  
14 were coded using the International Classification of Diseases, 10th edition (ICD-10).  
15 This retrospective study included eight years of data, from 1 January 2012 to 31  
16 December 2019, and the information was available on 6755 patients.

### 31 **Study population and study inclusion and exclusion criteria**

32  
33 Adult patients ( $\geq 18$  years) with T2DM were included. If a patient was admitted more  
34 than once during the study period, data pertinent to the last admission were extracted  
35 to obtain the most recent information on health conditions. Individuals with gestational  
36 diabetes, type 1 diabetes, secondary diabetes, and unknown types of diabetes were  
37 excluded.  
38  
39  
40  
41  
42  
43  
44

### 45 **Study variables**

46  
47 We extracted and categorised the following information from the database:  
48

- 49 • age (18–39 years, 40–59 years, 60–69 years or  $\geq 70$  years),
- 50 • sex (male or female),
- 51 • education (university/college, class 7–12, class 1–6, or no qualification),
- 52 • occupation (manual worker [i.e., more physical work than mental work], non-  
53 manual worker [i.e., more mental work than physical work], or never  
54 worked/retired),
- 55
- 56
- 57
- 58
- 59
- 60

- marital status (married or single/divorced/widowed),
- residence (urban or rural using the “hukou” system i.e., the Chinese household registration system),
- health insurance,
- smoking (current status),
- alcohol consumption (current status),
- duration of T2DM ( $\leq$  1 year, > 1–5 years, > 5–10 years, or > 10 years), and
- blood glucose level (glycated haemoglobin [HbA1c < 7% (good) or  $\geq$  7% (poor)], estimated using the high-performance liquid chromatographic method and D-10 Haemoglobin Analyser [Bio-Rad, USA]). In China, the recommended HbA1c treatment target did not change over the study period (< 7% for most patients with T2DM).[19-21]

In addition, information on comorbidities was extracted. The index condition was T2DM. Comorbidity was defined as the co-existence of at least one other chronic condition, i.e., either a physical non-communicable disease (duration  $\geq$  3 months), a mental health condition (duration  $\geq$  3 months), or an infectious disease (duration  $\geq$  3 months).[5-7] T2DM-specific complications (i.e., microvascular complications, such as diabetic retinopathy, nephropathy, and neuropathy/foot) were excluded as these were consequences of the index condition; hence, they were not considered as comorbidities.[6]

### **Ethics**

The Research Ethics Committee of the Ningbo First Hospital, China, approved this study (2020-R106). The researchers had no access to information that could identify individual patients during the data analyses. No informed consent was required as per research ethics rules.

### **Patient and public involvement**

1  
2  
3  
4 Patients and the public were not involved in the study.  
5  
6

### 7 **Statistical analyses**

8  
9 We calculated numbers and percentages for categorical variables and means and  
10 standard deviations (SDs) for normally distributed continuous variables. We used a  
11 simple logistic regression method to investigate the association between the different  
12 variables and comorbidities. We developed a multiple logistic regression model to  
13 identify any independent associations. For this, we used backward stepwise  
14 regression analysis and included all the variables. Additionally, we performed a  
15 sensitivity analysis — in the multiple logistic regression model, we included only those  
16 variables that had a p-value  $\leq 0.20$  in simple logistic regressions. We calculated odds  
17 ratios (ORs) and 95% confidence intervals (CIs). We used IBM SPSS Statistics version  
18 26.0 for Windows for statistical analyses.  
19  
20  
21  
22  
23  
24  
25  
26  
27  
28  
29  
30

### 31 **RESULTS**

32  
33 A total of 4777 patients with T2DM satisfied the eligibility criteria. The mean ( $\pm$ SD) age  
34 of patients was 64.2 ( $\pm$ 14.2) years, and approximately 52% (n=2482) of them were  
35 men. The mean ( $\pm$ SD) HbA1c level was 9.2% ( $\pm$ 2.4%). Over eight years, the  
36 prevalence of comorbidities was 93.7%. The year-wise prevalences from 2012 to 2019  
37 were 96.9%, 95.0%, 92.9%, 95.5%, 93.2%, 91.5%, 94.0%, and 93.6%, respectively.  
38  
39  
40  
41  
42  
43  
44

45 Figure 1 shows the number of comorbidities in our study. The mean ( $\pm$ SD) number of  
46 comorbidities was 3 ( $\pm$ 1). Figure 2 shows the percentage of comorbidities in our study  
47 in the different age groups. In the  $\geq 70$  years age group, 68.5% (1247) had  $\geq 3$   
48 comorbidities, whereas the prevalences were only 33.1% (102), 43.5% (592), and 55.5%  
49 (715) in the 18–39, 40–59, and 60–69 years age groups, respectively. Table 1 reports  
50 the most common comorbidities in our study. Essential hypertension (49.4%),  
51 disorders of lipoprotein metabolism and other lipidaemias (33.7%), nontoxic thyroid  
52 nodule (22.8%), fatty change of liver (20.6%), and cataract (10.7%) were the five most  
53  
54  
55  
56  
57  
58  
59  
60



prevalent comorbidities.

Table 2 reports the characteristics of the study participants. We found that the comorbidities were associated with age, sex, education, occupation, marital status, residence, health insurance, and the duration of T2DM. Table 3 reports the multiple backward stepwise logistic regression analysis for determining factors independently associated with the comorbidities. The odds of comorbidities increased with the age of patients (18–39 years: 1; 40–59 years: OR 2.80, 95% CI 1.98–3.96; 60–69 years: 4.43, 3.04–6.44; and  $\geq 70$  years: 10.97, 7.17–16.77). The odds were lower in female patients (0.66, 0.51–0.84), patients residing in rural areas (0.75, 0.59–0.95), and patients without health insurance (0.62, 0.46–0.83). The odds were higher in single/divorced/widowed patients compared to married patients (1.95, 1.21–3.12). We obtained similar results in the sensitivity analysis.

## DISCUSSION

In our tertiary care department in Ningbo, China, approximately 94% of the patients with T2DM had comorbidities and this influenced the overall management. In a previous study, we found that approximately 72% of the patients with T2DM were prescribed polypharmacy.[22] There are no similar studies on comorbidities conducted in patients with T2DM in China published in the English language. However, we found two similar studies published in Mandarin: one on patients with diabetes at a community health centre and another on outpatients with T2DM at a tertiary care hospital.[23, 24] The corresponding prevalence figures were around 95% and 73%, respectively. The different prevalence figures could be explained by the differences in population characteristics, the study setting, and the definition of comorbidity applied. Several studies have been conducted on this subject in high-income countries such as the United States and European countries.[25–29] All these studies, and also our study, have highlighted the fact that comorbidities are highly prevalent in patients with T2DM. A systematic review and meta-analysis of the prevalence of comorbidities in patients

1  
2  
3 with T2DM in different geographical locations and the factors associated with it will be  
4 helpful.  
5  
6  
7

8  
9 Comorbidities are not synonymous with complications.[6] In a previous study on the  
10 vascular complications of T2DM, we included microvascular complications (i.e.,  
11 diabetic retinopathy, nephropathy, and neuropathy/foot) and macrovascular  
12 complications (i.e., coronary heart disease, stroke, and peripheral arterial disease) and  
13 found that more than half of the patients with T2DM had vascular complications.[30] In  
14 the present study, we explored comorbidities in patients with T2DM using a  
15 recommended definition. Comorbidity was defined as the co-existence of at least one  
16 other chronic condition, either a physical (non-communicable/infectious disease) or  
17 mental health condition.[5-7] Unlike the previous study, in the present study,  
18 microvascular complications were excluded, as these were consequences of T2DM  
19 and should not be considered as comorbidities.[6] Although human immunodeficiency  
20 virus (HIV) infection, tuberculosis (TB) and mental health conditions are common  
21 comorbidities in patients with T2DM,[31-34] these were not the most common  
22 comorbidities in this study. The prevalences of these infectious diseases are low in  
23 Ningbo,[35-38] and there are chances that mental health conditions were  
24 underreported. It should also be noted that infectious diseases and mental health  
25 conditions as index conditions are treated in other specialised hospitals in Ningbo.  
26  
27  
28  
29  
30  
31  
32  
33  
34  
35  
36  
37  
38  
39  
40  
41  
42  
43

44 We found that the odds of comorbidities increased with age in patients with T2DM. Age  
45 is one of the most well-studied and consistent determinants of comorbidities.[25, 28,39]  
46 Age-related organ degeneration is a natural process and can lead to the development  
47 of many health conditions.[40] However, it should be noted that comorbidities do not  
48 correspond with age and they are not limited to the older population alone.[41] In our  
49 study, the prevalences of comorbidities were around 80% and 91% in the 18–39 and  
50 40–59 years age groups, respectively. We found that the odds of comorbidities were  
51 lower in female patients with T2DM compared with those in their male counterparts.  
52 This finding is consistent with other studies.[25, 28] This could be due to differences at  
53  
54  
55  
56  
57  
58  
59  
60

1  
2  
3  
4 the biological level. Another potential reason could be the reporting differences in sex-  
5 specific health conditions. For example, female patients with T2DM often present with  
6 atypical symptoms of cardiovascular diseases.[42] Additionally, the standard non-  
7 invasive diagnostic tests perform better in men than in women.[43] All these hinder the  
8 diagnosis of cardiovascular diseases in women. Another example is benign prostatic  
9 hyperplasia, one of the most common comorbidities in our study. This comorbidity was  
10 diagnosed because of the compulsory ultrasound scan of the urinary system of  
11 patients with T2DM at our hospital for possible kidney diseases. In comparison, the  
12 gynaecological examination is not a routine examination in women with T2DM.  
13  
14  
15  
16  
17  
18  
19  
20  
21  
22

23 We found that the odds of comorbidities were lower in patients with T2DM residing in  
24 rural areas compared to those in urban areas. This could be due to economic growth,  
25 urbanisation, and its negative consequences such as an unhealthy lifestyle.[44-46]  
26 The link between an unhealthy lifestyle and chronic conditions (particularly non-  
27 communicable diseases) is well established.[47] A similar association has also  
28 emerged with comorbidities.[23,48] Another reason could be that rural patients in  
29 China have limited access to healthcare and thus, they may undergo fewer diagnostic  
30 tests and obtain fewer confirmations of health conditions.[49] We found that the odds  
31 of comorbidities were lower in patients with T2DM without health insurance compared  
32 to those with health insurance. This could be due to the fact that over 90% of the  
33 Chinese population have some sort of health insurance,[50] and these patients may  
34 undergo more diagnostic tests (within the scope of their health insurance policy) and  
35 obtain confirmation of a range of health conditions.[51] We found that the odds of  
36 comorbidities were higher in single/divorced/widowed patients with T2DM compared  
37 with those in married patients. In general, the spouses of married patients provide both  
38 physical and mental support to them, and this could help them manage their existing  
39 health conditions and prevent new ones from emerging.[52,53]  
40  
41  
42  
43  
44  
45  
46  
47  
48  
49  
50  
51  
52  
53  
54  
55  
56  
57

58 This study has several strengths and weaknesses. Comorbidity is a less-explored area  
59 in China, and to the best of our knowledge, this was the first study to explore  
60

1  
2  
3  
4 comorbidities in patients with T2DM in Ningbo and the broader Zhejiang Province. The  
5 quality of our routinely collected data was good. Unlike other studies where  
6 comorbidities in T2DM were self-reported by the patients with T2DM using a  
7 predetermined list of selected comorbidities,[23, 24] we used a holistic approach. All  
8 the conditions were coded using the International Classification of Diseases, 10th  
9 edition (ICD-10) in our database, and we included all the chronic conditions in our  
10 study. This also minimised the possibility of recall bias in our study. Our study had  
11 extremely low missing data; only HbA1c data were missing in 130 patients out of 4777  
12 (i.e., 2.7%). Multiple logistic regression analysis included a sample with missing data  
13 for the adjusted variable. Since it was a cross-sectional study, the causal relationship  
14 between variables and comorbidities could not be determined. We propose to conduct  
15 a longitudinal study to explore the effects of various factors on comorbidities, including  
16 factors considered in this study and other factors such as physical activity and diet that  
17 were not present in our database and could not be adjusted for in the models. In our  
18 study, the high prevalence of comorbidities could be due to the study setting (i.e.,  
19 hospital). The findings of our hospital-based study could be valid in similar settings.  
20 We suggest conducting a population-based study that might provide a distinct picture  
21 of the issue in Ningbo.  
22  
23  
24  
25  
26  
27  
28  
29  
30  
31  
32  
33  
34  
35  
36  
37  
38  
39  
40

41 In conclusion, we found that a large percentage of patients with T2DM in the tertiary  
42 care department in Ningbo, China, had comorbidities, and we also identified the factors  
43 associated with comorbidities. The findings could be used in developing, evaluating,  
44 and implementing interventions aimed at improving outcomes in patients with T2DM  
45 with comorbidities.  
46  
47  
48  
49  
50

51  
52 **ACKNOWLEDGEMENTS** The authors thank the patients and Yida Li for the  
53 management and organisation of the original data.  
54  
55  
56

57  
58 **CONTRIBUTORS** JL and KC designed the study. XL and KC analysed the data and  
59 wrote the first draft of the manuscript. SX and YC contributed to patient registration  
60

1  
2  
3  
4 and data entry. XL contributed to data cleaning. XL, KC, SX, YC, MX, LL and JL revised  
5 it critically for important intellectual content and approved the final version.  
6  
7  
8

9  
10 **FUNDING** The work was supported by the Medical Health Science and Technology  
11 Project of Zhejiang Province (Grant No. 2019KY562) and the Major Program of Social  
12 Development of Ningbo Science and Technology Bureau (Grant No. 2019C50094).  
13  
14  
15

16  
17 **COMPETING INTERESTS** None declared.  
18  
19

20  
21 **ETHICS APPROVAL** The Research Ethics Committee of Ningbo First Hospital, China  
22 approved the study (2020-R106).  
23  
24  
25

26  
27 **DATA SHARING STATEMENT** The dataset will be available upon request unless  
28 there are legal or ethical reasons for not doing so.  
29  
30  
31

## 32 REFERENCES

- 33 1. Ningbo Municipal Statistics Bureau. Statistical Bulletin on National Economic and  
34 Social Development in Ningbo, China, 2018.  
35
- 36 2. Health and Family Planning Commission of Ningbo Municipality. Prevention and  
37 treatment of chronic diseases in Ningbo.  
38 <http://www.cnnb.com.cn/nbzfxwfbh/system/2014/05/22/008068694.shtml> (accessed  
39 25 Apr 2020).  
40  
41  
42
- 43 3. Yao DZ, Sun XH, Li JH. Prevalence and risk factors of diabetes in people over 40  
44 years of age in Ningbo city area. *Modern Practical Medicine* 2016;28:1343-5.  
45  
46
- 47 4. Li H, Cui J, Gong J, *et al*. Diabetes morbidity and mortality of residents in Ningbo,  
48 2010-2014. *Chinese Rural Health Service Administration* 2016;36:1304-7.  
49  
50
- 51 5. World Health Organization. *Multimorbidity*. Geneva: Switzerland, 2016.  
52  
53
- 54 6. Ording AG, Sørensen HT. Concepts of comorbidities, multiple morbidities,  
55 complications, and their clinical epidemiologic analogs. *Clin Epidemiol* 2013;5:199-203.  
56  
57
- 58 7. Valderas JM, Starfield B, Sibbald B, *et al*. Defining comorbidity: implications for  
59 understanding health and health services. *Ann Fam Med* 2009;7:357-63.  
60

- 1  
2  
3  
4  
5 8. Einarson TR, Acs A, Ludwig C, *et al*. Prevalence of cardiovascular disease in type  
6 2 diabetes: a systematic literature review of scientific evidence from across the world  
7 in 2007-2017. *Cardiovasc Diabetol* 2018;17:83.  
8  
9  
10 9. Nouwen A, Winkley K, Twisk J, *et al*. Type 2 diabetes mellitus as a risk factor for the  
11 onset of depression: a systematic review and meta-analysis. *Diabetologia*  
12 2010;53:2480-6.  
13  
14  
15 10. Yokomichi H, Nagai A, Hirata M, *et al*. Survival of macrovascular disease, chronic  
16 kidney disease, chronic respiratory disease, cancer and smoking in patients with type  
17 2 diabetes: BioBank Japan cohort. *J Epidemiol* 2017;27:S98-S106.  
18  
19  
20 11. Adriaanse MC, Drewes HW, van der Heide I, *et al*. The impact of comorbid chronic  
21 conditions on quality of life in type 2 diabetes patients. *Qual Life Res* 2016;25:175-82.  
22  
23  
24 12. Wermeling PR, Gorter KJ, van Stel HF, *et al*. Both cardiovascular and non-  
25 cardiovascular comorbidity are related to health status in well-controlled type 2  
26 diabetes patients: a cross-sectional analysis. *Cardiovasc Diabetol* 2012;11:121.  
27  
28  
29 13. Gruneir A, Markle-Reid M, Fisher K, *et al*. Comorbidity burden and health services  
30 use in community-living older adults with diabetes mellitus: a retrospective cohort study.  
31 *Can J Diabetes* 2016;40:35-42.  
32  
33  
34 14. Terauchi Y, Ozaki A, Zhao XH, *et al*. Humanistic and economic burden of  
35 cardiovascular disease related comorbidities and hypoglycaemia among patients with  
36 type 2 diabetes in Japan. *Diabetes Res Clin Pract* 2019;149:115-25.  
37  
38  
39 15. Australian Bureau of Statistics. *National Health Survey: First Result, 2014-15*.  
40 Canberra: Australian, 2015.  
41  
42  
43 16. Druss BG, Marcus SC, Olfson M, *et al*. Comparing the national economic burden  
44 of five chronic conditions. *Health Aff (Millwood)* 2001;20:233-41.  
45  
46  
47 17. Ningbo First Hospital. Hospital Introduction.  
48 <http://www.nbdyyy.com/col/col100/index.html> (accessed 25 Apr 2020).  
49  
50  
51 18. Ministry of Health of the People's Republic of China. *The measures for the*  
52 *administration of the hospital grade*. Beijing: Ministry of Health of the People's  
53 Republic of China, 1989.  
54  
55  
56 19. Chinese Diabetes Society. China guideline for type 2 diabetes (2010 ed). *Chin J*  
57 *Diabetes* 2012;20:S1-S36.  
58  
59  
60

- 1  
2  
3 20. Chinese Diabetes Society. China guideline for type 2 diabetes (2013 ed). *Chin J*  
4 *Endocrinol Metab* 2014;30:893-942.  
5  
6
- 7 21. Jia W, Weng J, Zhu D, *et al*. Standards of medical care for type 2 diabetes in China  
8 2019. *Diabetes Metab Res Rev* 2019;35:e3158.  
9
- 10  
11 22. Li J, Chattopadhyay K, Xu M, *et al*. Prevalence and predictors of polypharmacy  
12 prescription among type 2 diabetes patients at a tertiary care department in Ningbo,  
13 China: a retrospective database study. *PLoS One* 2019;14:e0220047.  
14  
15
- 16 23. Xing Y, Wang P, Yang X. A survey of comorbidity and health behaviors of diabetic  
17 patients in an area of Beijing. *Journal of Chinese Physician* 2020;22:379-84.  
18  
19
- 20 24. Zhao W, Zhao D, Wang X, *et al*. Current status and influential factors of co-  
21 morbidity for patients with type 2 diabetes mellitus in Tongzhou district of Beijing. *Chin*  
22 *J Health Manage* 2019;13:541-5.  
23  
24
- 25 25. Alonso-Morán E, Orueta JF, Esteban JI, *et al*. Multimorbidity in people with type 2  
26 diabetes in the Basque country (Spain): prevalence, comorbidity clusters and  
27 comparison with other chronic patients. *Eur J Intern Med* 2015;26:197-202.  
28  
29
- 30 26. Lin PJ, Kent DM, Winn A, *et al*. Multiple chronic conditions in type 2 diabetes  
31 mellitus: prevalence and consequences. *Am J Manag Care* 2015;21:e23-34.  
32  
33
- 34 27. Teljeur C, Smith SM, Paul G, *et al*. Multimorbidity in a cohort of patients with type  
35 2 diabetes. *Eur J Gen Pract* 2013;19:17-22.  
36  
37
- 38 28. Iglay K, Hannachi H, Howie PJ, *et al*. Prevalence and co-prevalence of  
39 comorbidities among patients with type 2 diabetes mellitus. *Curr Med Res Opin*  
40 2016;32:1243-52.  
41  
42
- 43 29. Hermans MP, Dath N. Prevalence and co-prevalence of comorbidities in Belgian  
44 patients with type 2 diabetes mellitus: a transversal, descriptive study. *Acta Clin*  
45 *Belg* 2018;73:68-74.  
46  
47
- 48 30. Li J, Chattopadhyay K, Xu M, *et al*. Prevalence and associated factors of vascular  
49 complications among inpatients with type 2 diabetes: a retrospective database study  
50 at a tertiary care department, Ningbo, China. *PloS One* 2020;15:e0235161.  
51  
52
- 53 31. Workneh MH, Bjune GA, Yimer SA. Prevalence and associated factors of  
54 tuberculosis and diabetes mellitus comorbidity: a systematic review. *PloS One*  
55 2017;12:e0175925.  
56  
57
- 58 32. Berkowitz N, Okorie A, Goliath R, *et al*. The prevalence and determinants of active  
59  
60

1  
2  
3 tuberculosis among diabetes patients in Cape Town, South Africa, a high HIV/TB  
4 burden setting. *Diabetes Res Clin Pract* 2018;138:16-25.

5  
6  
7 33. Hadigan C, Kattakuzhy S. Diabetes mellitus type 2 and abnormal glucose  
8 metabolism in the setting of human immunodeficiency virus. *Endocrinol Metab Clin*  
9 *North Am* 2014;43:685-96.

10  
11  
12 34. Garrett C, Doherty A. Diabetes and mental health. *Clin Med (Lond)* 2014;14:669-  
13 72.

14  
15  
16 35. Yang T, Chen T, Che Y, *et al*. Factors associated with catastrophic total costs due  
17 to tuberculosis under a designated hospital service model: a cross-sectional study in  
18 China. *BMC Public Health* 2020;20:1009.

19  
20  
21 36. Liu K, Li T, Vongpradith A, *et al*. Identification and prediction of tuberculosis in  
22 eastern China: analyses from 10-year population-based notification data in Zhejiang  
23 province, China. *Sci Rep* 2020;10:7425.

24  
25  
26 37. Zhang JH, Li HL, Shi HB, *et al*. Survival analysis of HIV/AIDS patients with access  
27 to highly antiretroviral therapy in Ningbo during 2004-2015. *Zhonghua Liu Xing Bing*  
28 *Xue Za Zhi* 2016;37:1262-7.

29  
30  
31 38. Ministry of Health of the People's Republic of China, UNAIDS, WHO. Estimation  
32 for HIV/AIDS epidemic trend in 2011, China. *Chin J AIDS STD* 2012;18:1-5.

33  
34  
35 39. Mata-Cases M, Franch-Nadal J, Real J, *et al*. Prevalence and coprevalence of  
36 chronic comorbid conditions in patients with type 2 diabetes in Catalonia: a population-  
37 based cross-sectional study. *BMJ Open* 2019;9:e031281.

38  
39  
40 40. King M, Lipsky MS. Clinical implications of aging. *Dis Mon* 2015;61:467-74.

41  
42  
43 41. van Oostrom SH, Gijzen R, Stirbu I, *et al*. Time trends in prevalence of chronic  
44 diseases and multimorbidity not only due to aging: data from general practices and  
45 health surveys. *PLoS One* 2016;11:e0160264.

46  
47  
48 42. Wada H, Miyauchi K, Daida H. Gender Differences in the clinical features and  
49 outcomes of patients with coronary artery disease. *Expert Rev Cardiovasc Ther*  
50 2019;17:127-33.

51  
52  
53 43. Shah AS, Griffiths M, Lee KK, *et al*. High sensitivity cardiac troponin and the under-  
54 diagnosis of myocardial infarction in women: prospective cohort study. *BMJ*  
55 2015;350:g7873.

56  
57  
58 44. Zhu W, Chi A, Sun Y. Physical activity among older Chinese adults living in urban  
59  
60



1  
2  
3 and rural areas: a review. *J Sport Health Sci* 2016;5:281-6.  
4

5  
6 45. Muntner P, Gu D, Wildman RP, *et al*. Prevalence of physical activity among  
7 Chinese adults: results from the international collaborative study of cardiovascular  
8 disease in Asia. *Am J Public Health* 2005;95:1631-6.  
9

10  
11 46. Miao J, Wu X. Urbanization, socioeconomic status and health disparity in China.  
12 *Health Place* 2016;42:87-95.  
13

14  
15 47. World Health Organization. *Global action plan for the prevention and control of*  
16 *NCD 2013-2020*. Geneva: Switzerland, 2013.  
17

18  
19 48. Wang X, Chen J, Liu X, *et al*. Identifying patterns of lifestyle behaviors among  
20 people with type 2 diabetes in Tianjin, China: a latent class analysis. *Diabetes Ther*  
21 2017;8:1379-92.  
22

23  
24 49. Liu Z, Albanese E, Li S, *et al*. Chronic disease prevalence and care among the  
25 elderly in urban and rural Beijing, China - a 10/66 dementia research group cross-  
26 sectional survey. *BMC Public Health* 2009;9:394.  
27

28  
29 50. Zhao C, Wang C, Shen C, *et al*. China's achievements and challenges in improving  
30 health insurance coverage. *Drug Discov Ther* 2018;12:1-6.  
31

32  
33 51. Yang C, Huang Z, Sun K, *et al*. Comparing the economic burden of type 2 diabetes  
34 mellitus patients with and without medical insurance: a cross-sectional study in China.  
35 *Med Sci Monit* 2018;24:3039-102.  
36

37  
38 52. Stroebe M, Schut H, Stroebe W. Health outcomes of bereavement. *Lancet* 2007;  
39 370:1960-73.  
40

41  
42 53. Parajuli J, Saleh F, Thapa N, Ali L. Factors associated with nonadherence to diet  
43 and physical activity among Nepalese type 2 diabetes patients: a cross sectional study.  
44 *BMC Res Notes* 2014;7:758.  
45  
46  
47  
48  
49  
50  
51  
52  
53  
54  
55  
56  
57  
58  
59  
60

Figure 1. Number of comorbidities in our study.

Figure 2. Percentage of comorbidities in our study in the different age groups.

Table 1. Most common comorbidities in our study.

| <b>Most common comorbidities (based on ICD-10 classification)</b>            | <b>Patients with T2DM n (%)</b> |
|------------------------------------------------------------------------------|---------------------------------|
| Essential hypertension (I10)                                                 | 2362 (49.4)                     |
| Disorders of lipoprotein metabolism and other lipidaemias (E78)              | 1612 (33.7)                     |
| Nontoxic thyroid nodule (E04)                                                | 1088 (22.8)                     |
| Fatty (change of) liver (K76)                                                | 984 (20.6)                      |
| Cataract (H26)                                                               | 512 (10.7)                      |
| Chronic ischemic heart disease (I25)                                         | 455 (9.5)                       |
| Atherosclerosis (I70)                                                        | 411 (8.6)                       |
| Osteoporosis (M81)                                                           | 348 (7.3)                       |
| Cerebral infarction (I63)                                                    | 341 (7.1)                       |
| Benign prostatic hyperplasia (N40)                                           | 303 (12.2*)                     |
| Abnormal findings on diagnostic imaging of lung (R91)                        | 287 (6.0)                       |
| Thoracic, thoracolumbar, and lumbosacral intervertebral disc disorders (M51) | 260 (5.4)                       |
| Obesity (E66)                                                                | 177 (3.7)                       |
| Cervical disc disorders (M50)                                                | 161 (3.4)                       |
| Chronic viral hepatitis (B18)                                                | 138 (2.9)                       |
| Sleep disorders (G47)                                                        | 135 (2.8)                       |
| Gout (M10)                                                                   | 132 (2.8)                       |
| Disorders of purine and pyrimidine metabolism (E79)                          | 127 (2.7)                       |
| Atrial fibrillation and flutter (I48)                                        | 118 (2.5)                       |
| Gastro-oesophageal reflux disease (K21)                                      | 111 (2.3)                       |

\*In 2482 males.

Table 2. Characteristics of the study participants.

|  | <b>Total (4777)</b> | <b>Comorbidity No (299)</b> | <b>Comorbidity Yes (4478)</b> | <b>Unadjusted OR (95% CI)</b> | <b>P value</b> |
|--|---------------------|-----------------------------|-------------------------------|-------------------------------|----------------|
|  |                     |                             |                               |                               |                |

|                                             |      | n (%)     | n (%)       |                    |        |
|---------------------------------------------|------|-----------|-------------|--------------------|--------|
| <b>Age (years)</b>                          |      |           |             |                    | <0.001 |
| 18-39                                       | 308  | 63 (20.5) | 245 (79.5)  | 1                  |        |
| 40-59                                       | 1360 | 120 (8.8) | 1240 (91.2) | 2.66 (1.90,3.71)   |        |
| 60-69                                       | 1289 | 75 (5.8)  | 1214 (94.2) | 4.16 (2.90,5.98)   |        |
| ≥70                                         | 1820 | 41 (2.3)  | 1779 (97.7) | 11.16 (7.37,16.90) |        |
| <b>Sex</b>                                  |      |           |             |                    | 0.008  |
| Male                                        | 2482 | 133 (5.4) | 2349 (94.6) | 1                  |        |
| Female                                      | 2295 | 166 (7.2) | 2129 (92.8) | 0.73 (0.57,0.92)   |        |
| <b>Education</b>                            |      |           |             |                    | 0.005  |
| University/college                          | 545  | 47 (8.6)  | 498 (91.4)  | 1                  |        |
| Class 7-12                                  | 1927 | 136 (7.1) | 1791 (92.9) | 1.24 (0.88,1.76)   |        |
| Class 1-6                                   | 1574 | 80 (5.1)  | 1494 (94.9) | 1.76 (1.21,2.56)   |        |
| No qualification                            | 731  | 36 (4.9)  | 695 (95.1)  | 1.82 (1.16,2.86)   |        |
| <b>Occupation</b>                           |      |           |             |                    | <0.001 |
| Manual worker                               | 1088 | 74 (6.8)  | 1014 (93.2) | 1                  |        |
| Non-manual worker                           | 1884 | 152 (8.1) | 1732 (91.9) | 0.83 (0.62,1.10)   |        |
| Never worked/retired                        | 1805 | 73 (4.0)  | 1732 (96.0) | 1.73 (1.24,2.41)   |        |
| <b>Marital status</b>                       |      |           |             |                    | 0.008  |
| Married                                     | 4207 | 278 (6.6) | 3929 (93.4) | 1                  |        |
| Single/divorced/widowed                     | 570  | 21 (3.7)  | 549 (96.3)  | 1.85 (1.18,2.91)   |        |
| <b>Residence</b>                            |      |           |             |                    | <0.001 |
| Urban                                       | 2815 | 145 (5.2) | 2670 (94.8) | 1                  |        |
| Rural                                       | 1962 | 154 (7.8) | 1808 (92.2) | 0.64 (0.50,0.81)   |        |
| <b>Health insurance</b>                     |      |           |             |                    | <0.001 |
| Yes                                         | 4211 | 232 (5.5) | 3979 (94.5) | 1                  |        |
| No                                          | 564  | 67 (11.9) | 497 (88.1)  | 0.43 (0.33,0.58)   |        |
| <b>Smoking (current status)</b>             |      |           |             |                    | 0.073  |
| No                                          | 3714 | 245 (6.6) | 3469 (93.4) | 1                  |        |
| Yes                                         | 1063 | 54 (5.1)  | 1009 (94.9) | 1.32 (0.98,1.79)   |        |
| <b>Alcohol consumption (current status)</b> |      |           |             |                    | 0.713  |
| No                                          | 4169 | 263 (6.3) | 3906 (93.7) | 1                  |        |
| Yes                                         | 608  | 36 (5.9)  | 572 (94.1)  | 1.07 (0.75,1.53)   |        |
| <b>Duration of T2DM (years)</b>             |      |           |             |                    | <0.001 |
| ≤1                                          | 981  | 93 (9.5)  | 888 (90.5)  | 1                  |        |
| >1-5                                        | 880  | 60 (6.8)  | 820 (93.2)  | 1.43 (1.02,2.01)   |        |
| >5-10                                       | 1247 | 74 (5.9)  | 1173 (94.1) | 1.66 (1.21,2.28)   |        |
| >10                                         | 1669 | 72 (4.3)  | 1597 (95.7) | 2.32 (1.69,3.19)   |        |
| <b>Blood glucose level (HbA1c)</b>          |      |           |             |                    | 0.458  |
| <7%                                         | 899  | 64 (7.1)  | 835 (92.9)  | 1                  |        |
| ≥7%                                         | 3748 | 226 (6.0) | 3522 (94.0) | 1.19 (0.90,1.59)   |        |
| Unknown                                     | 130  | 9 (6.9)   | 121 (93.1)  | 1.03 (0.50,2.12)   |        |

Table 3. Multiple backward stepwise logistic regression analysis for determining factors independently associated with comorbidity.

|                         | Adjusted OR (95% CI) | P value |
|-------------------------|----------------------|---------|
| <b>Age (years)</b>      |                      | <0.001  |
| 18-39                   | 1                    |         |
| 40-59                   | 2.80 (1.98,3.96)     |         |
| 60-69                   | 4.43 (3.04,6.44)     |         |
| ≥70                     | 10.97 (7.17,16.77)   |         |
| <b>Sex</b>              |                      | <0.001  |
| Male                    | 1                    |         |
| Female                  | 0.66 (0.51,0.84)     |         |
| <b>Marital status</b>   |                      | 0.006   |
| Married                 | 1                    |         |
| Single/divorced/widowed | 1.95 (1.21,3.12)     |         |
| <b>Residence</b>        |                      | 0.018   |
| Urban                   | 1                    |         |
| Rural                   | 0.75 (0.59,0.95)     |         |
| <b>Health insurance</b> |                      | 0.002   |
| Yes                     | 1                    |         |
| No                      | 0.62 (0.46,0.83)     |         |

1  
2  
3  
4  
5  
6  
7  
8  
9  
10  
11  
12  
13  
14  
15  
16  
17  
18  
19  
20  
21  
22  
23  
24  
25  
26  
27  
28  
29  
30  
31  
32  
33  
34  
35  
36  
37  
38  
39  
40  
41  
42  
43  
44  
45  
46  
47  
48  
49  
50  
51  
52  
53  
54  
55  
56  
57  
58  
59  
60

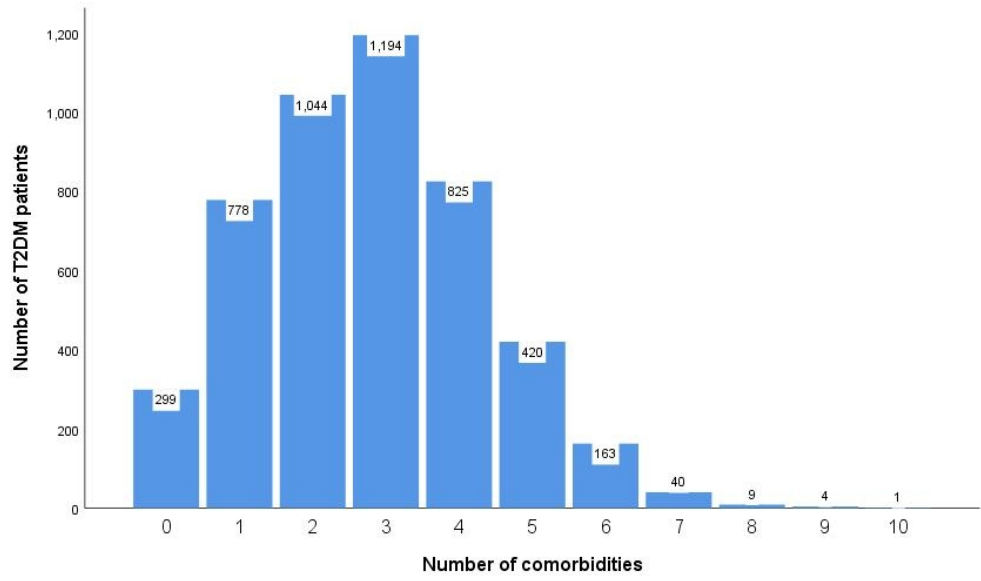

Figure 1. Number of comorbidities in our study.

300x176mm (72 x 72 DPI)

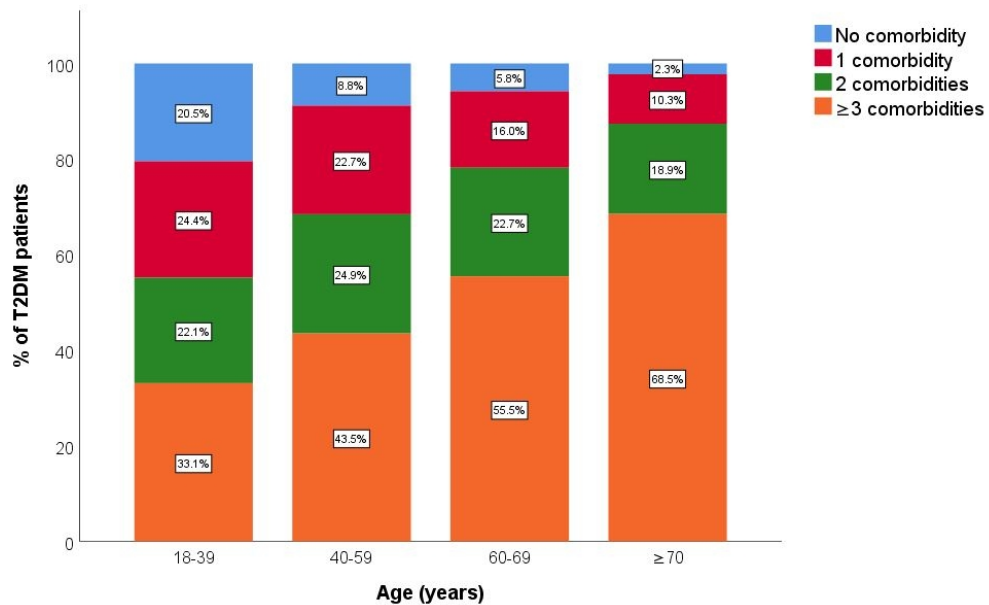

Figure 2. Percentage of comorbidities in our study in the different age groups

256x159mm (96 x 96 DPI)

**STROBE 2007 (v4) Statement—Checklist of items that should be included in reports of *cross-sectional studies***

| Section/Topic                | Item # | Recommendation                                                                                                                                                                       | Reported on page # |
|------------------------------|--------|--------------------------------------------------------------------------------------------------------------------------------------------------------------------------------------|--------------------|
| <b>Title and abstract</b>    | 1      | (a) Indicate the study's design with a commonly used term in the title or the abstract                                                                                               | 1,2                |
|                              |        | (b) Provide in the abstract an informative and balanced summary of what was done and what was found                                                                                  | 2,3                |
| <b>Introduction</b>          |        |                                                                                                                                                                                      |                    |
| Background/rationale         | 2      | Explain the scientific background and rationale for the investigation being reported                                                                                                 | 4                  |
| Objectives                   | 3      | State specific objectives, including any prespecified hypotheses                                                                                                                     | 4                  |
| <b>Methods</b>               |        |                                                                                                                                                                                      |                    |
| Study design                 | 4      | Present key elements of study design early in the paper                                                                                                                              | 5                  |
| Setting                      | 5      | Describe the setting, locations, and relevant dates, including periods of recruitment, exposure, follow-up, and data collection                                                      | 5                  |
| Participants                 | 6      | (a) Give the eligibility criteria, and the sources and methods of selection of participants                                                                                          | 5                  |
| Variables                    | 7      | Clearly define all outcomes, exposures, predictors, potential confounders, and effect modifiers. Give diagnostic criteria, if applicable                                             | 5,6                |
| Data sources/<br>measurement | 8*     | For each variable of interest, give sources of data and details of methods of assessment (measurement). Describe comparability of assessment methods if there is more than one group | 5,6                |
| Bias                         | 9      | Describe any efforts to address potential sources of bias                                                                                                                            | 5,6                |
| Study size                   | 10     | Explain how the study size was arrived at                                                                                                                                            | 5                  |
| Quantitative variables       | 11     | Explain how quantitative variables were handled in the analyses. If applicable, describe which groupings were chosen and why                                                         | 5,6,7              |
| Statistical methods          | 12     | (a) Describe all statistical methods, including those used to control for confounding                                                                                                | 7                  |
|                              |        | (b) Describe any methods used to examine subgroups and interactions                                                                                                                  | n/a                |
|                              |        | (c) Explain how missing data were addressed                                                                                                                                          | 7, Table2          |
|                              |        | (d) If applicable, describe analytical methods taking account of sampling strategy                                                                                                   | n/a                |
|                              |        | (e) Describe any sensitivity analyses                                                                                                                                                | 7                  |
| <b>Results</b>               |        |                                                                                                                                                                                      |                    |

|                          |     |                                                                                                                                                                                                              |                                       |
|--------------------------|-----|--------------------------------------------------------------------------------------------------------------------------------------------------------------------------------------------------------------|---------------------------------------|
| Participants             | 13* | (a) Report numbers of individuals at each stage of study—eg numbers potentially eligible, examined for eligibility, confirmed eligible, included in the study, completing follow-up, and analysed            | 5,7                                   |
|                          |     | (b) Give reasons for non-participation at each stage                                                                                                                                                         | n/a                                   |
|                          |     | (c) Consider use of a flow diagram                                                                                                                                                                           | n/a                                   |
| Descriptive data         | 14* | (a) Give characteristics of study participants (eg demographic, clinical, social) and information on exposures and potential confounders                                                                     | 7, Table2                             |
|                          |     | (b) Indicate number of participants with missing data for each variable of interest                                                                                                                          | Table2                                |
| Outcome data             | 15* | Report numbers of outcome events or summary measures                                                                                                                                                         | 7, Figure 1, Figure 2, Table1, Table2 |
| Main results             | 16  | (a) Give unadjusted estimates and, if applicable, confounder-adjusted estimates and their precision (eg, 95% confidence interval). Make clear which confounders were adjusted for and why they were included | 7, 8, Table2                          |
|                          |     | (b) Report category boundaries when continuous variables were categorized                                                                                                                                    | 7, 8, Table2, Table3                  |
|                          |     | (c) If relevant, consider translating estimates of relative risk into absolute risk for a meaningful time period                                                                                             | n/a                                   |
| Other analyses           | 17  | Report other analyses done—eg analyses of subgroups and interactions, and sensitivity analyses                                                                                                               | 7, 8                                  |
| <b>Discussion</b>        |     |                                                                                                                                                                                                              |                                       |
| Key results              | 18  | Summarise key results with reference to study objectives                                                                                                                                                     | 8, 9, 10, 11                          |
| Limitations              | 19  | Discuss limitations of the study, taking into account sources of potential bias or imprecision. Discuss both direction and magnitude of any potential bias                                                   | 10, 11                                |
| Interpretation           | 20  | Give a cautious overall interpretation of results considering objectives, limitations, multiplicity of analyses, results from similar studies, and other relevant evidence                                   | 8, 9, 10, 11                          |
| Generalisability         | 21  | Discuss the generalisability (external validity) of the study results                                                                                                                                        | 11                                    |
| <b>Other information</b> |     |                                                                                                                                                                                                              |                                       |
| Funding                  | 22  | Give the source of funding and the role of the funders for the present study and, if applicable, for the original study on which the present article is based                                                | 11                                    |

\*Give information separately for cases and controls in case-control studies and, if applicable, for exposed and unexposed groups in cohort and cross-sectional studies.

**Note:** An Explanation and Elaboration article discusses each checklist item and gives methodological background and published examples of transparent reporting. The STROBE checklist is best used in conjunction with this article (freely available on the Web sites of PLoS Medicine at <http://www.plosmedicine.org/>, Annals of Internal Medicine at <http://www.annals.org/>, and Epidemiology at <http://www.epidem.com/>). Information on the STROBE Initiative is available at [www.strobe-statement.org](http://www.strobe-statement.org).
